# Supplementary material for: Syngas production from phenolic pollutants via a series of hydroxylation, ring cleavage, and aqueous-phase reforming catalyzed by a hydrotalcite-supported Fe–Mn–Ni alloy
Source: Royal Society of Chemistry journal article supplement (doi:10.1039/d4re00348a), 2024-01-01
Supplement: d4re00348a1.pdf [file d4re00348a1.pdf]

## SUPPORTING INFORMATION

### **Syngas Production from Phenolic Pollutants via A Series of Hydroxylation, Ring Cleavage, and Aqueous-Phase Reforming Catalyzed by Hydrotalcite-Supported Fe-Mn-Ni Alloy**

Hanifrahmawan Sudibyo<sup>a,b,\*</sup>, Daniela V. Cabrera<sup>c</sup>, Rodrigo Labatut<sup>c</sup>, Calvin J. Supriyanto<sup>a</sup>,  
Budhijanto Budhijanto<sup>a</sup>, Adhika Widyaparaga<sup>b,d</sup>

<sup>a</sup>Chemical Engineering Department, Universitas Gadjah Mada, Yogyakarta 55281, Indonesia

<sup>b</sup>Center for Energy Studies, Universitas Gadjah Mada, Yogyakarta 55281, Indonesia

<sup>c</sup>Department of Hydraulic and Environmental Engineering, Pontificia Universidad Católica de  
Chile, Santiago 8331150, Chile

<sup>d</sup>Mechanical Engineering Department, Universitas Gadjah Mada, Yogyakarta 55281, Indonesia

\*corresponding author: [hanifrahmawan.s@ugm.ac.id](mailto:hanifrahmawan.s@ugm.ac.id)

Number of figures : 21

Number of tables : 12

## TABLE OF CONTENTS

|                                                                                                                                                                                   |    |
|-----------------------------------------------------------------------------------------------------------------------------------------------------------------------------------|----|
| <b>TABLE OF CONTENTS</b> .....                                                                                                                                                    | 2  |
| Figure S1. Experimental procedures for batch experiment in the first and second stages. ....                                                                                      | 4  |
| Figure S2. Experimental setup for semi-continuous experiment in the third stage. ....                                                                                             | 4  |
| Figure S3. Pareto charts for % <i>TOC</i> <sub>removal</sub> from the DSD experiments. The displayed active metals are those with the highest ten counts. ....                    | 5  |
| Figure S4. Pareto charts for H <sub>2</sub> yield from the DSD experiments. The displayed active metals are those with the highest ten counts. ....                               | 5  |
| Figure S5. Pareto charts for CO:H <sub>2</sub> molar ratio from the DSD experiments. The displayed active metals are those with the highest ten counts. ....                      | 6  |
| Figure S6. Pareto charts for H <sub>2</sub> purity in the gas product from the DSD experiments. The displayed active metals are those with the highest ten counts. ....           | 6  |
| Figure S7. Pareto charts for SBrA of the catalysts whose compositions are defined in Table S2. The displayed active metals are those with the highest ten counts. ....            | 7  |
| Figure S8. Pareto charts for WBrA of the catalysts whose compositions are defined in Table S2. The displayed active metals are those with the highest ten counts. ....            | 7  |
| Figure S9. Pareto charts for WLA of the catalysts whose compositions are defined in Table S2. The displayed active metals are those with the highest ten counts. ....             | 8  |
| Figure S10. Pareto charts for SLA of the catalysts whose compositions are defined in Table S2. The displayed active metals are those with the highest ten counts. ....            | 8  |
| Figure S11. Pareto charts for SBS of the catalysts whose compositions are defined in Table S2. The displayed active metals are those with the highest ten counts. ....            | 9  |
| Figure S12. Pareto charts for phenols conversion. The displayed active metals are those with the highest ten counts. ....                                                         | 9  |
| Figure S13. Pareto charts for acid content in the aqueous product. The displayed active metals are those with the highest ten counts. ....                                        | 10 |
| Figure S14. The TON and TOF and the % <i>TOC</i> <sub>removal</sub> and CO-to-H <sub>2</sub> ratio of the optimized Fe-Mn-Ni/HT catalysts at reaction temperature of 200 °C. .... | 11 |
| Figure S15. The TON and TOF and the % <i>TOC</i> <sub>removal</sub> and CO-to-H <sub>2</sub> ratio of the optimized Fe-Mn-Ni/HT catalysts at reaction temperature of 300 °C. .... | 11 |
| Figure S16. The XRD diffractograms for (a) hydrotalcite (HT), (b) Fe/HT, (c) Mn/HT, (d) Ni/HT, (e) Fe-Mn/HT, (f) Fe-Ni/HT, (g) Mn-Ni/HT, and (h) Fe-Mn-Ni/HT. ....                | 12 |
| Figure S17. The XRD diffractograms for (a) Fe/HT, (b) Mn/HT, (c) Ni/HT, (d) Fe-Mn/HT, (e) Fe-Ni/HT, (f) Mn-Ni/HT, and (g) Fe-Mn-Ni/HT after being used for producing syngas. .... | 13 |
| Figure S18. The N <sub>2</sub> -BET plots for (a) hydrotalcite (HT), (b) Fe/HT, (c) Mn/HT, (d) Ni/HT, (e) Fe-Mn/HT, (f) Fe-Ni/HT, (g) Mn-Ni/HT, and (h) Fe-Mn-Ni/HT. ....         | 14 |

|                                                                                                                                                                                                                                             |    |
|---------------------------------------------------------------------------------------------------------------------------------------------------------------------------------------------------------------------------------------------|----|
| Figure S19. The N <sub>2</sub> -BET plots for (a) Fe/HT, (b) Mn/HT, (c) Ni/HT, (d) Fe-Mn/HT, (e) Fe-Ni/HT, (f) Mn-Ni/HT, and (g) Fe-Mn-Ni/HT after being used for producing syngas. ....                                                    | 16 |
| Figure S20. The NH <sub>3</sub> -TPD and CO <sub>2</sub> -TPD plots for (a) hydrotalcite (HT), (b) Fe/HT, (c) Mn/HT, (d) Ni/HT, (e) Fe-Mn/HT, (f) Fe-Ni/HT, (g) Mn-Ni/HT, and (h) Fe-Mn-Ni/HT. ....                                         | 19 |
| Figure S21. The NH <sub>3</sub> -TPD and CO <sub>2</sub> -TPD plots for (a) Fe/HT, (b) Mn/HT, (c) Ni/HT, (d) Fe-Mn/HT, (e) Fe-Ni/HT, (f) Mn-Ni/HT, and (g) Fe-Mn-Ni/HT after being used for producing syngas. ....                          | 21 |
| Table S1. The examined weight percents of first-row transition metals from the total 20 wt% active metal content on hydrotalcite according to the definitive screening design (DSD). ....                                                   | 25 |
| Table S2. The examined weight percents of Fe, Mn, and Ni from the total 20 wt% active metal content on hydrotalcite according to the simplex centroid design (SCD). ....                                                                    | 26 |
| Table S3. Complete results for regression analysis on experimental data from the second-stage SCD experiment. ....                                                                                                                          | 27 |
| Table S4. Physicochemical properties of ten different catalysts defined by the simplex centroid design protocol in Table S2. ....                                                                                                           | 28 |
| Table S5. Active sites composition of ten different catalysts defined by the simplex centroid design protocol in Table S2. Acidic site is expressed as mmol NH <sub>3</sub> /g and basic site is expressed as mmol CO <sub>2</sub> /g. .... | 29 |
| Table S6. Summary of XPS results for oxidation states and chemical bonds associated with active metals on hydrotalcite. ....                                                                                                                | 30 |
| Table S7. Chemical concentration of the aqueous products from the SCD experiments using ten different catalysts defined in Table S2. ....                                                                                                   | 31 |
| Table S8. Time evolution of concentration of compounds in the aqueous product from semi-continuous processing of 0.15 M <i>o</i> -cresol. ....                                                                                              | 32 |
| Table S9. Time evolution of concentration of compounds in the aqueous product from semi-continuous processing of 0.15 M <i>o</i> -chlorophenol. ....                                                                                        | 33 |
| Table S10. Time evolution of concentration of compounds in the aqueous product from semi-continuous processing of 0.15 M <i>o</i> -nitrophenol. ....                                                                                        | 34 |
| Table S11. The list of ordinary differential equations derived from unsteady-state mass balance of the reactants, intermediates, and products. ....                                                                                         | 35 |
| Table S12. The physisorption and chemisorption properties of the optimized catalyst after each cycle. ....                                                                                                                                  | 36 |

Figure S1. Experimental procedures for batch experiment in the first and second stages.

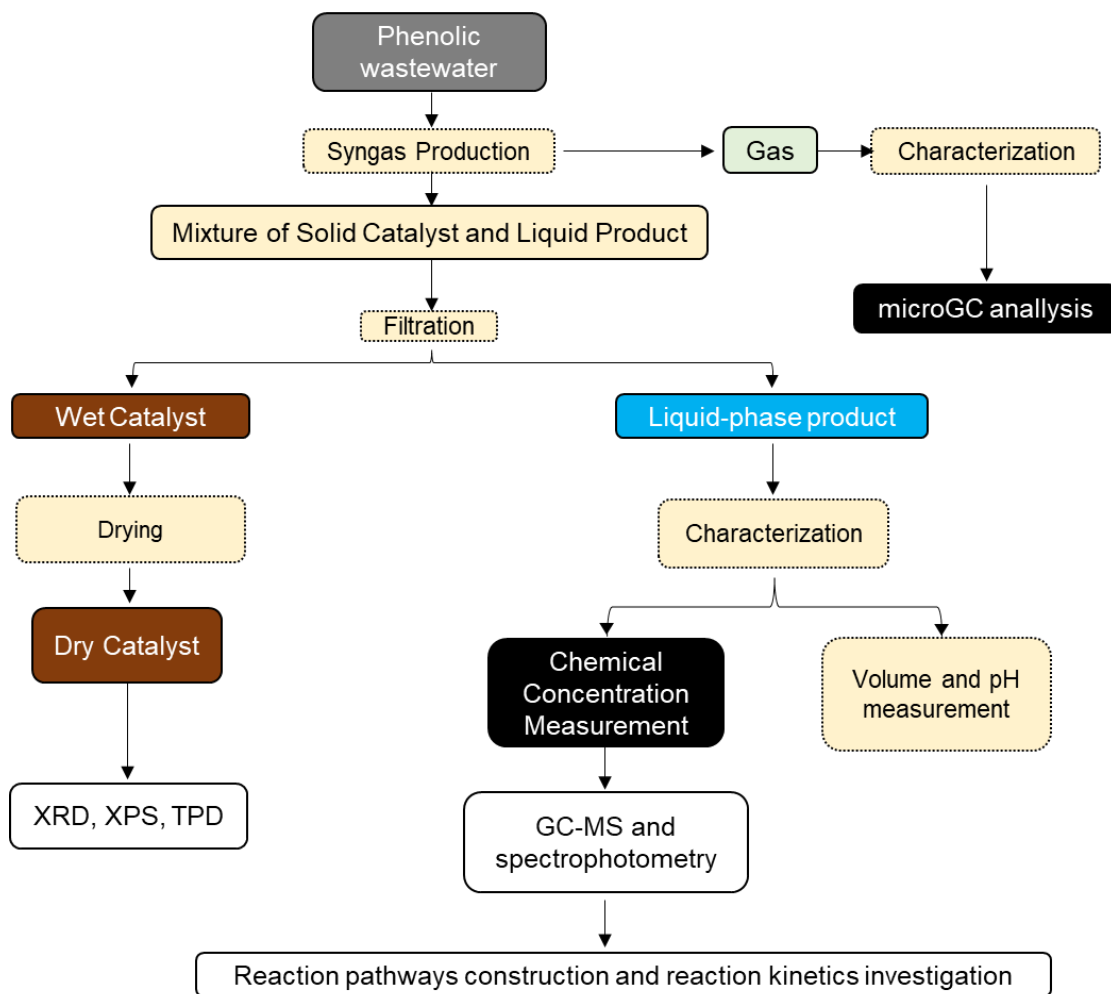

Figure S2. Experimental setup for semi-continuous experiment in the third stage.

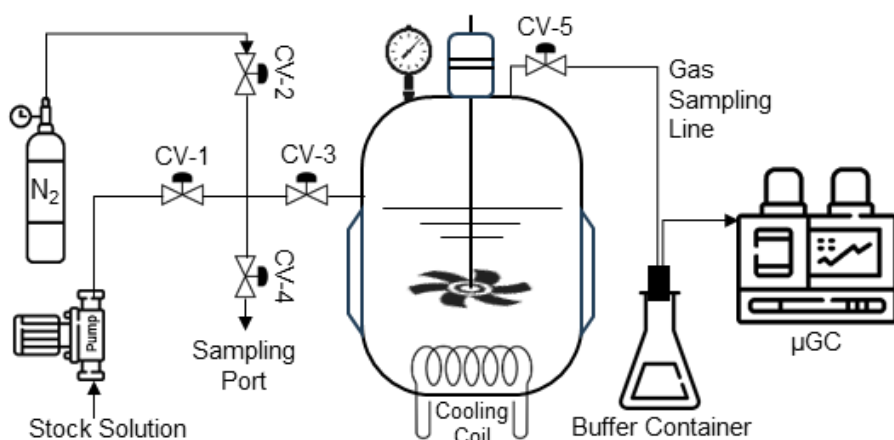

Figure S3. Pareto charts for % $TOC_{removal}$  from the DSD experiments. The displayed active metals are those with the highest ten counts.

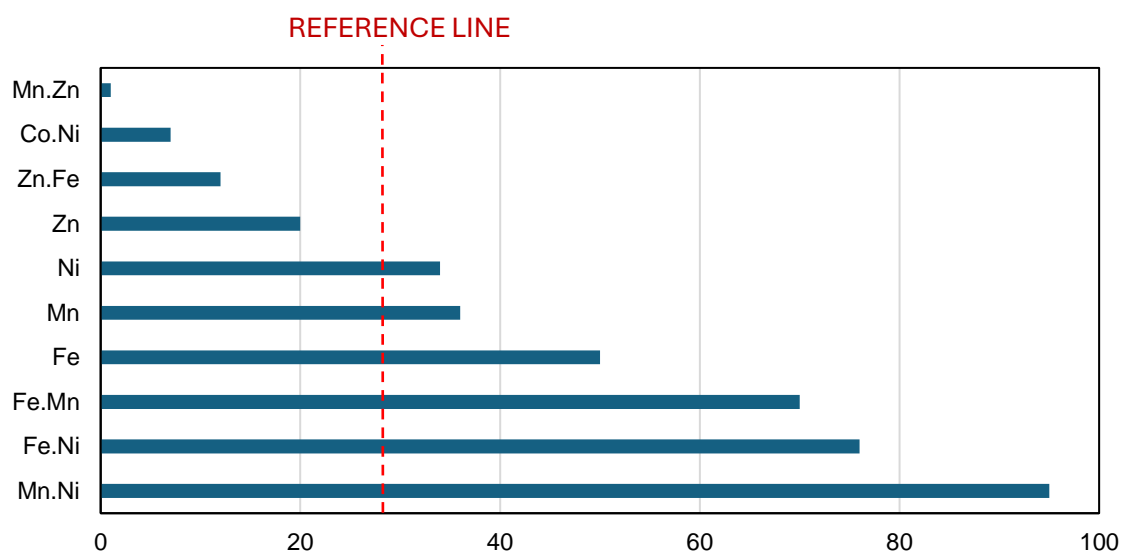

Figure S4. Pareto charts for  $H_2$  yield from the DSD experiments. The displayed active metals are those with the highest ten counts.

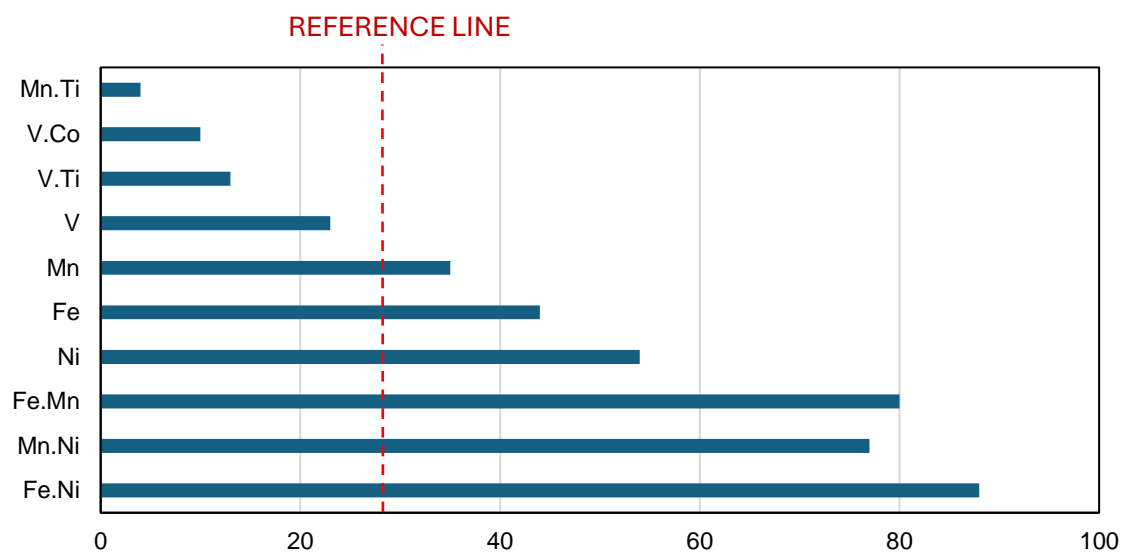

Figure S5. Pareto charts for CO:H2 molar ratio from the DSD experiments. The displayed active metals are those with the highest ten counts.

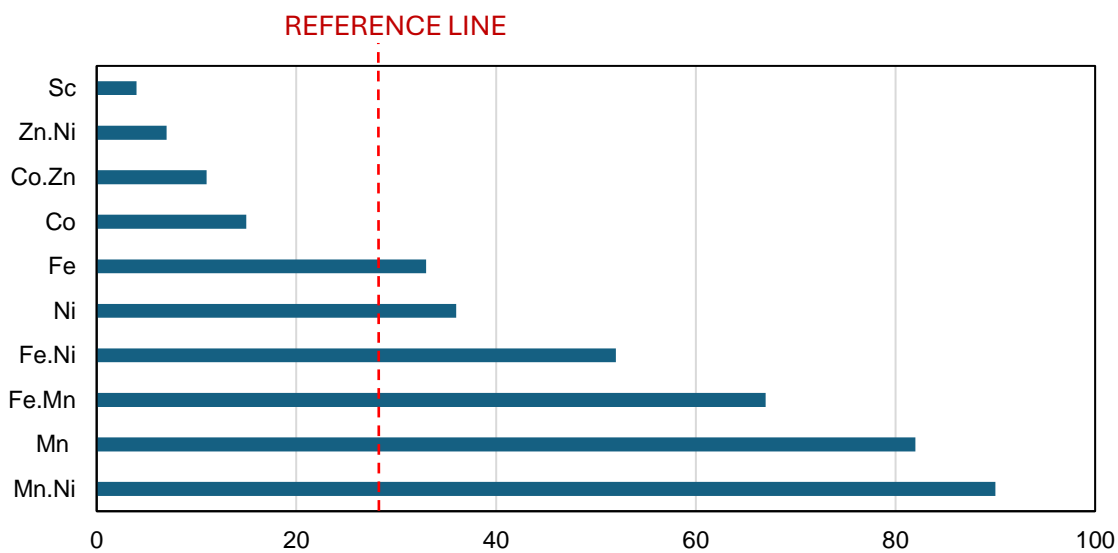

Figure S6. Pareto charts for H<sub>2</sub> purity in the gas product from the DSD experiments. The displayed active metals are those with the highest ten counts.

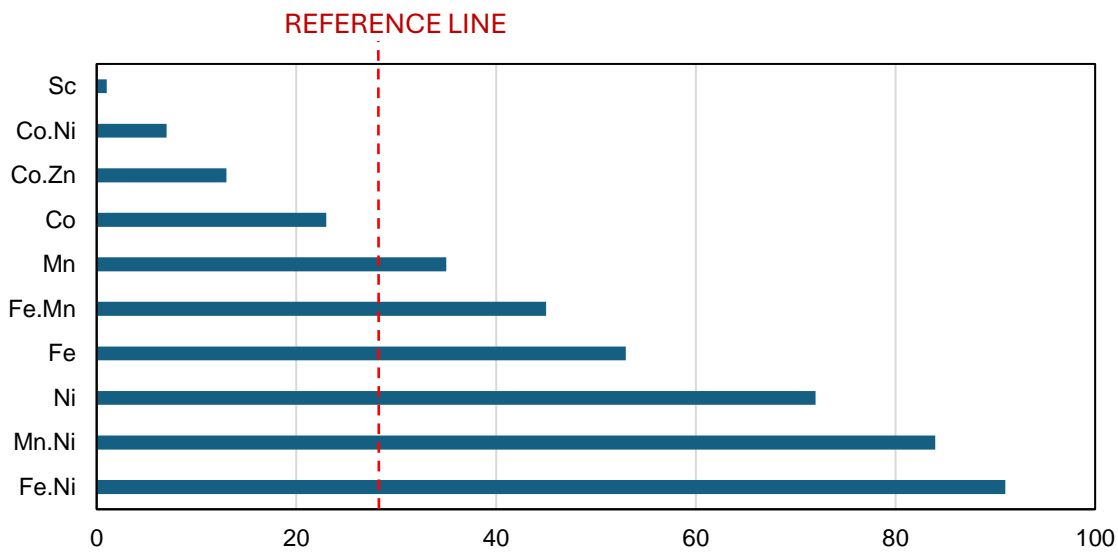

Figure S7. Pareto charts for SBrA of the catalysts whose compositions are defined in Table S2.

The displayed active metals are those with the highest ten counts.

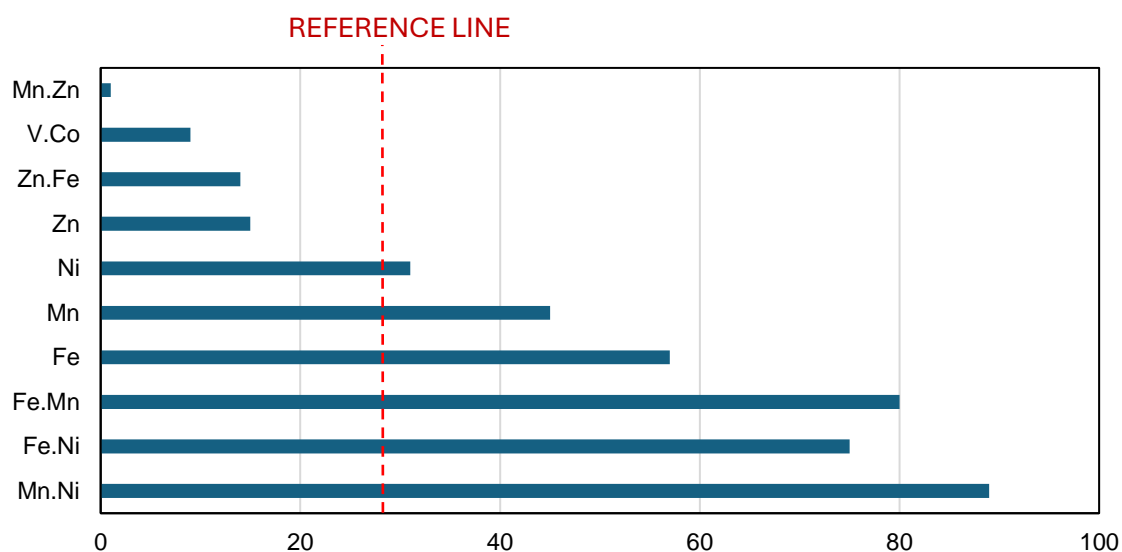

Figure S8. Pareto charts for WBrA of the catalysts whose compositions are defined in Table S2.

The displayed active metals are those with the highest ten counts.

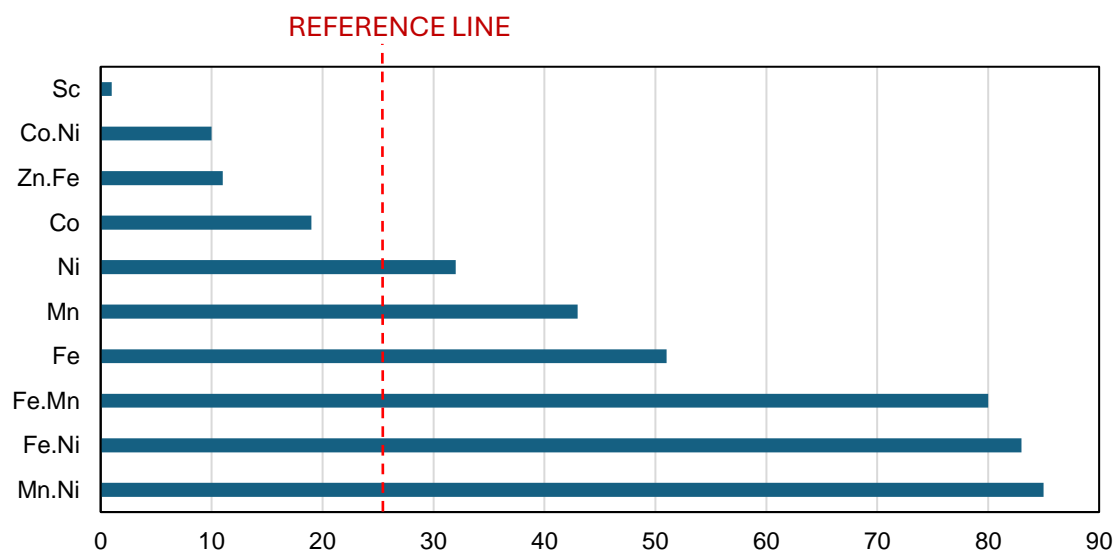

Figure S9. Pareto charts for WLA of the catalysts whose compositions are defined in Table S2.  
The displayed active metals are those with the highest ten counts.

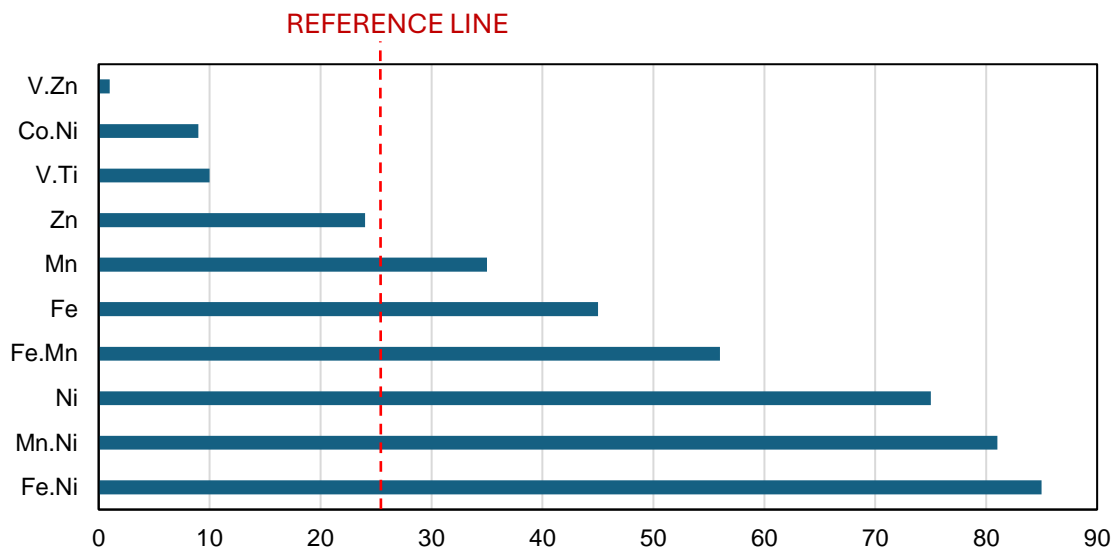

Figure S10. Pareto charts for SLA of the catalysts whose compositions are defined in Table S2.  
The displayed active metals are those with the highest ten counts.

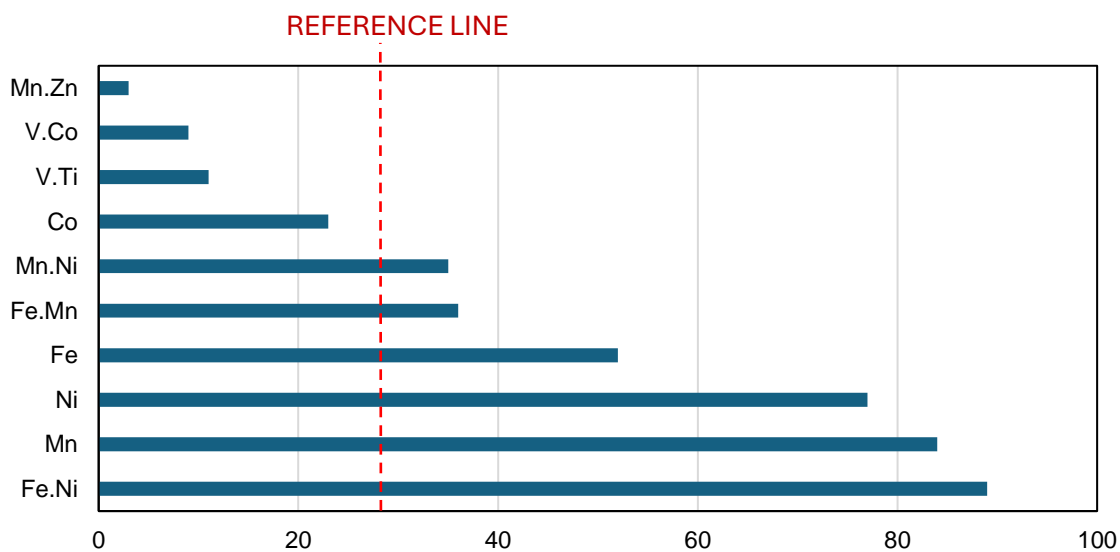



Figure S11. Pareto charts for SBS of the catalysts whose compositions are defined in Table S2.  
The displayed active metals are those with the highest ten counts.

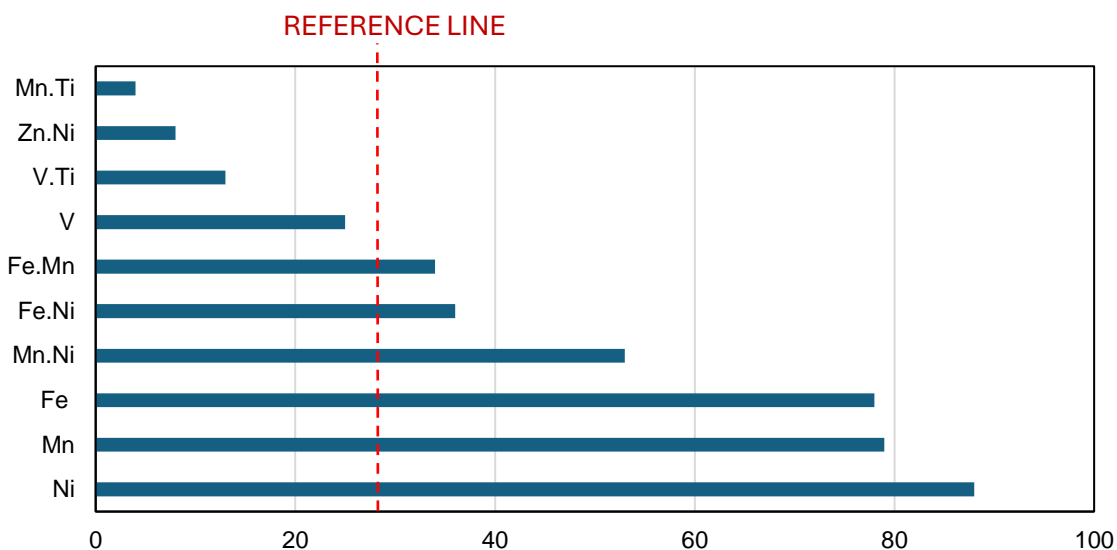

Figure S12. Pareto charts for phenols conversion. The displayed active metals are those with the highest ten counts.

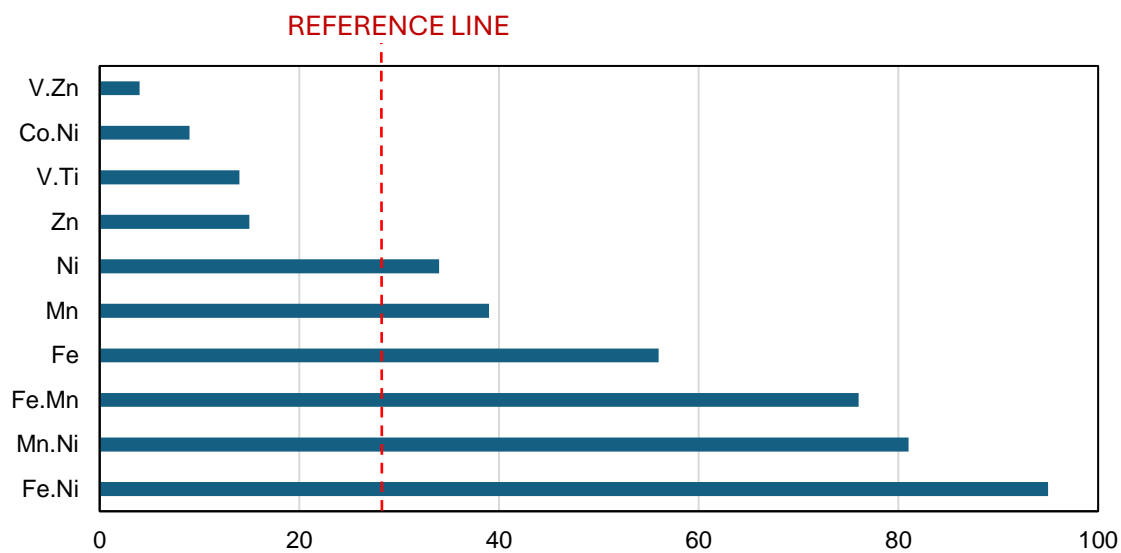

Figure S13. Pareto charts for acid content in the aqueous product. The displayed active metals are those with the highest ten counts.

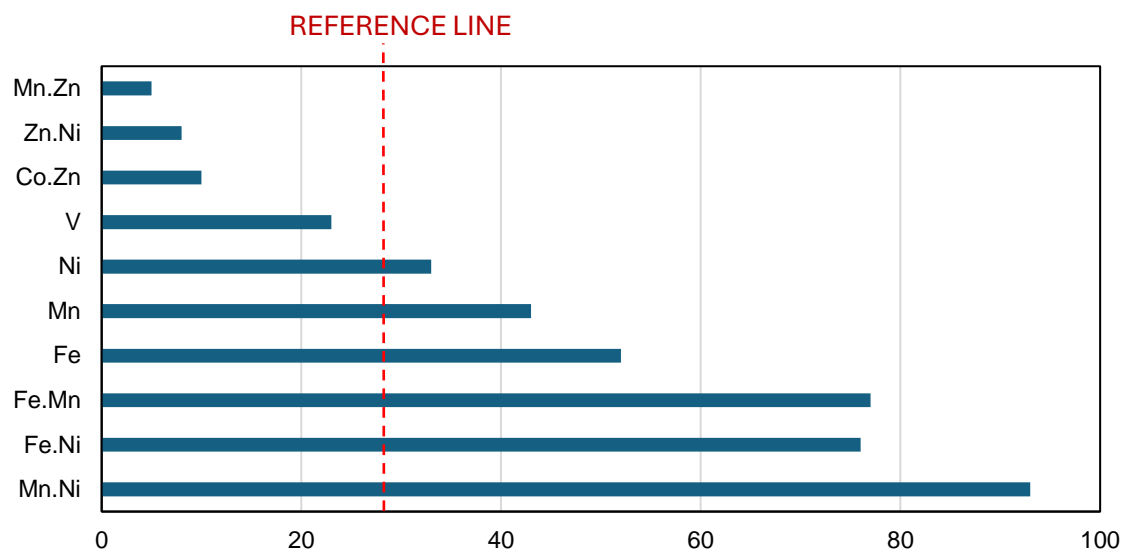

Figure S14. The TON and TOF and the % $TOC_{removal}$  and CO-to- $H_2$  ratio of the optimized Fe-Mn-Ni/HT catalysts at reaction temperature of 200 °C.

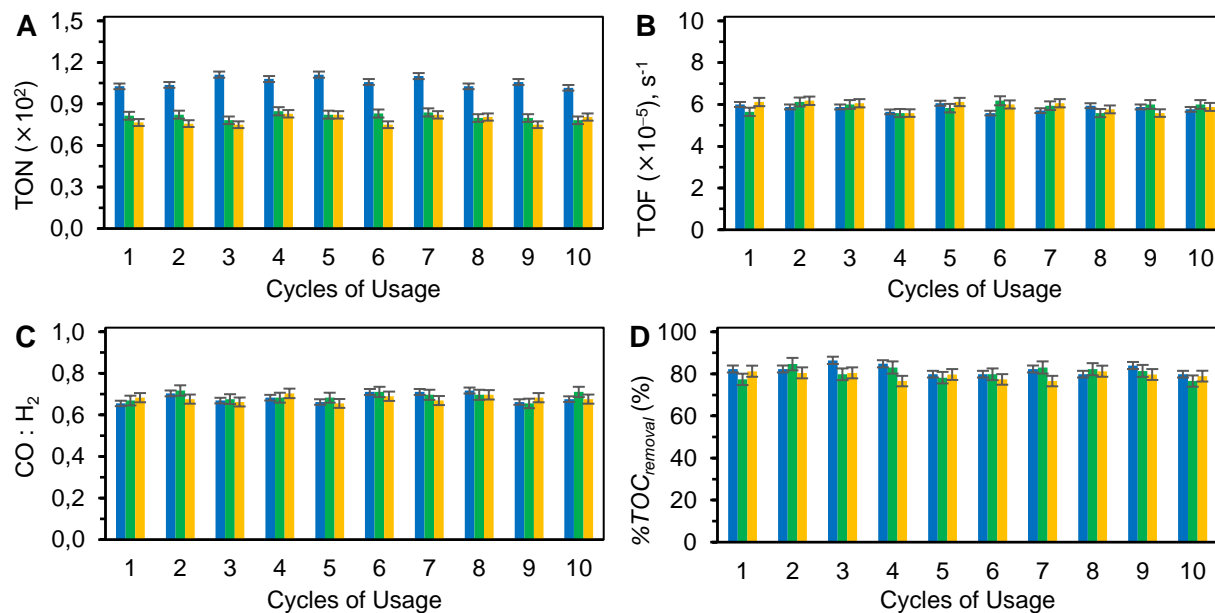

Figure S15. The TON and TOF and the % $TOC_{removal}$  and CO-to- $H_2$  ratio of the optimized Fe-Mn-Ni/HT catalysts at reaction temperature of 300 °C.

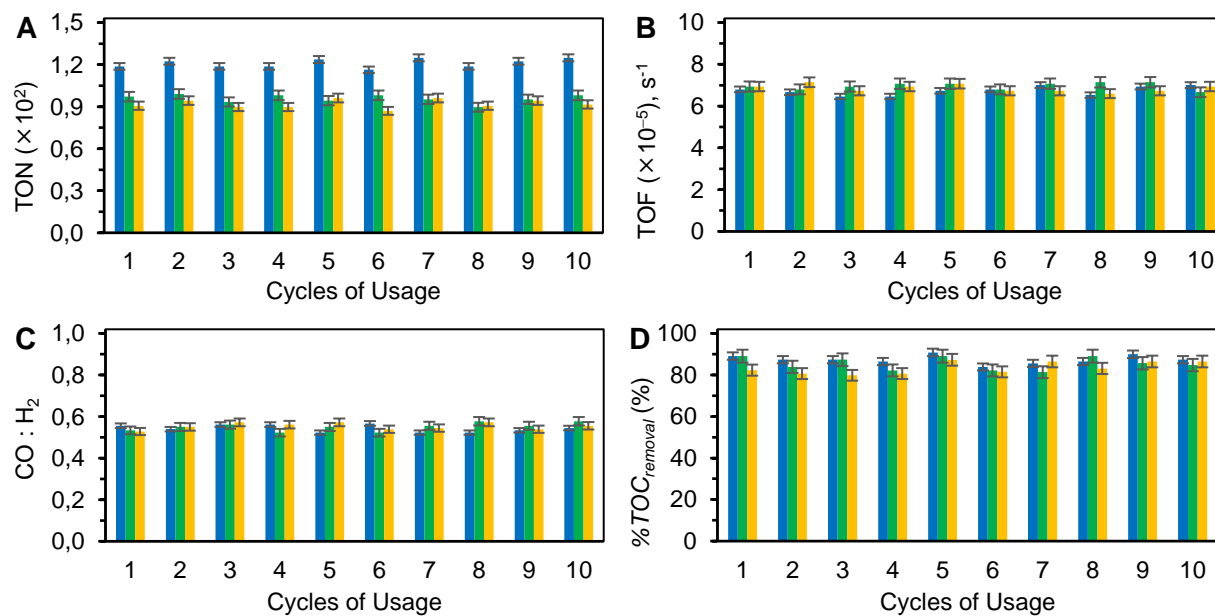

Figure S16. The XRD diffractograms for (a) hydrothermalite (HT), (b) Fe/HT, (c) Mn/HT, (d) Ni/HT, (e) Fe-Mn/HT, (f) Fe-Ni/HT, (g) Mn-Ni/HT, and (h) Fe-Mn-Ni/HT.

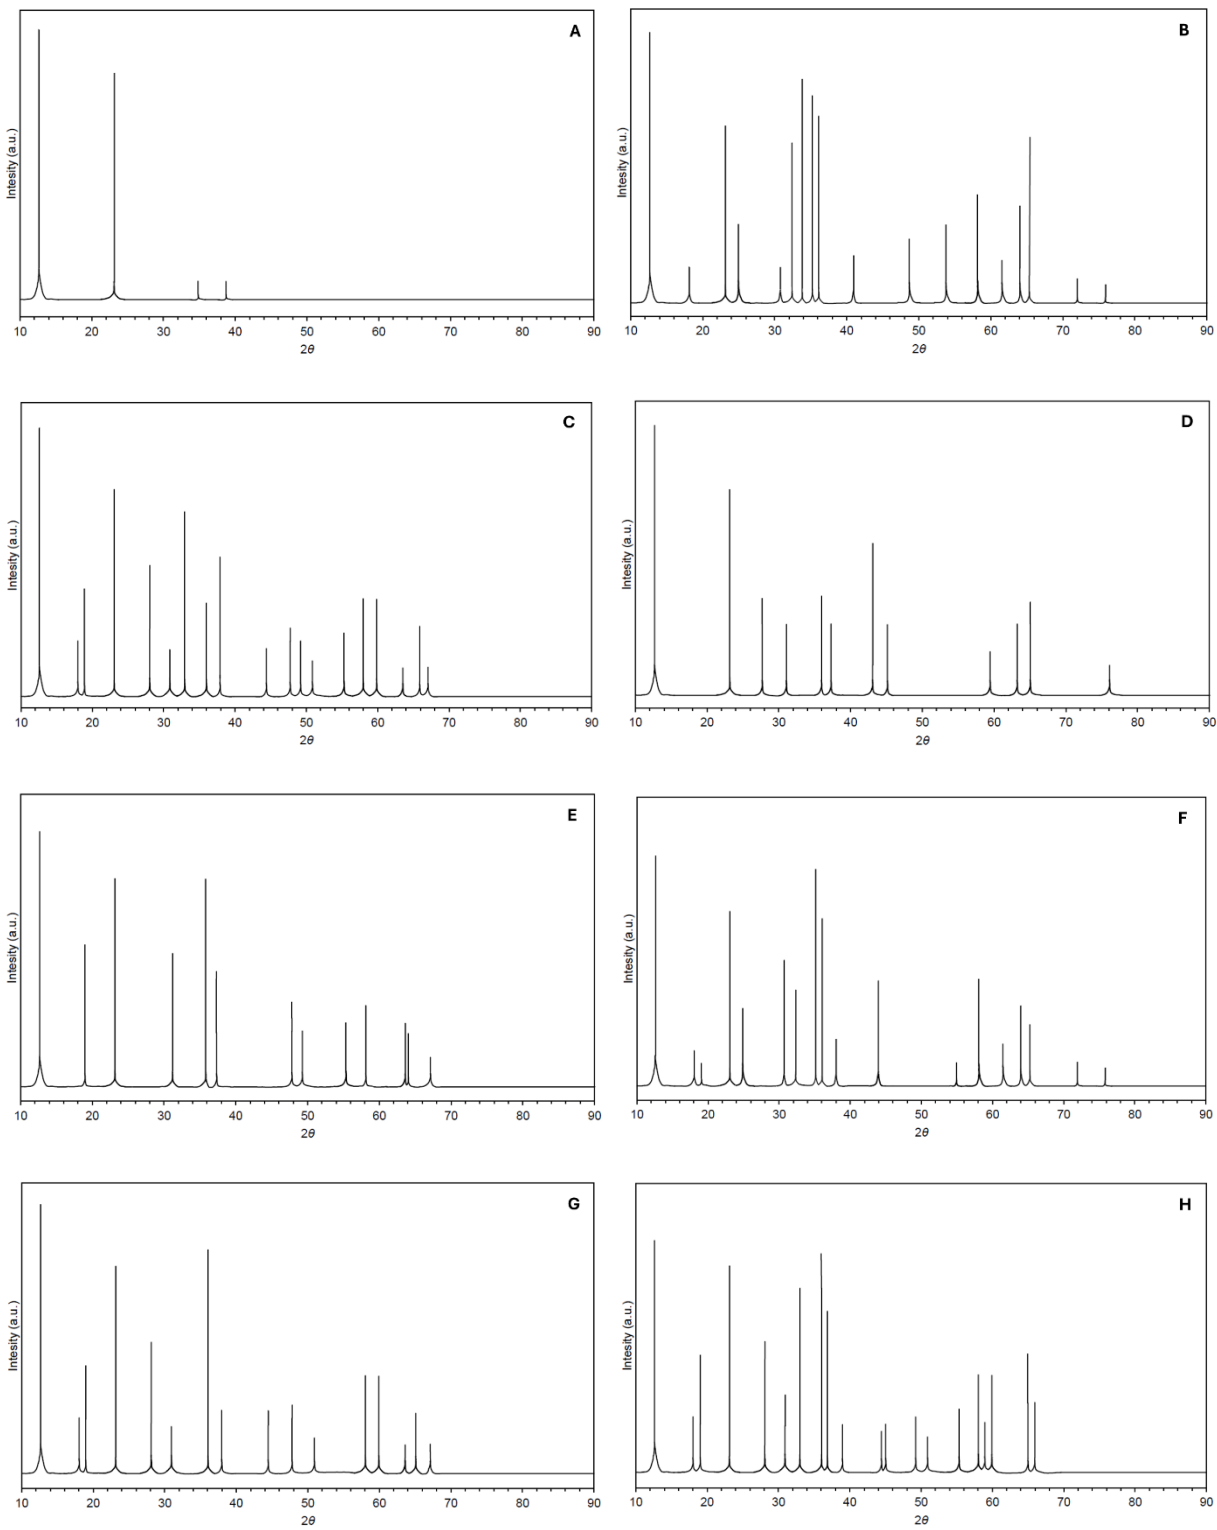

Figure S17. The XRD diffractograms for (a) Fe/HT, (b) Mn/HT, (c) Ni/HT, (d) Fe-Mn/HT, (e) Fe-Ni/HT, (f) Mn-Ni/HT, and (g) Fe-Mn-Ni/HT after being used for producing syngas.

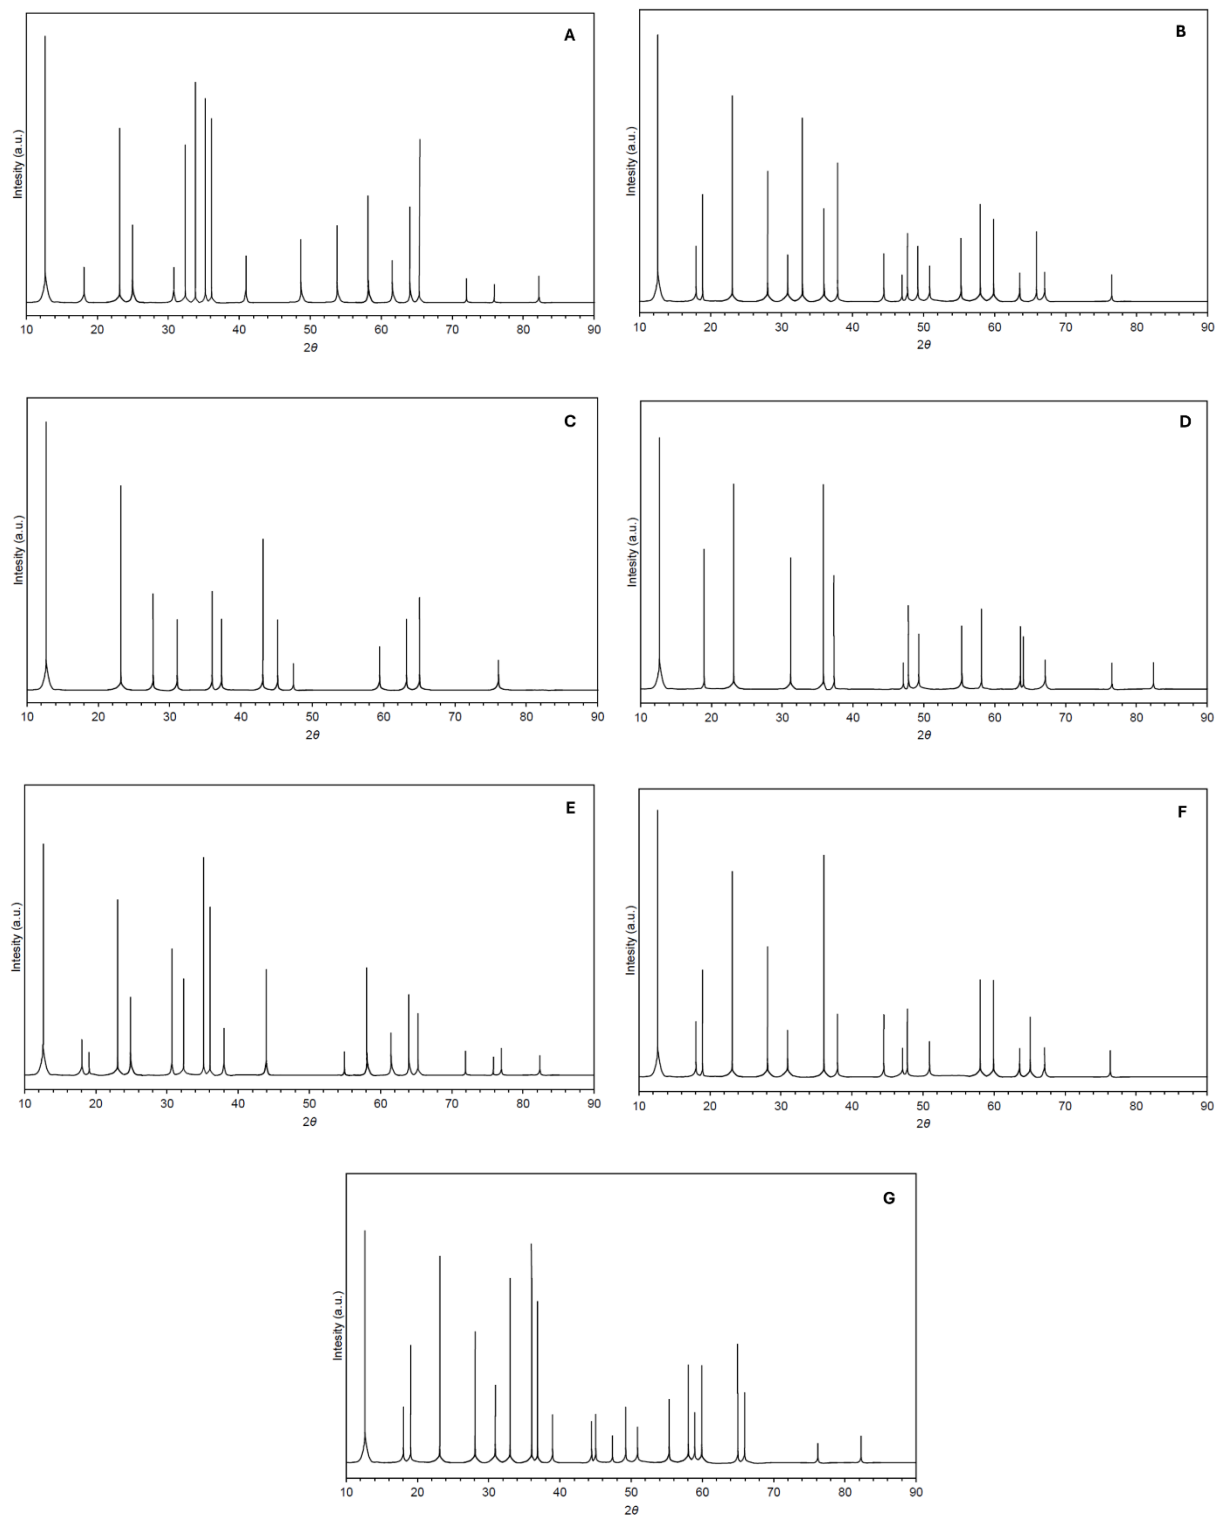

Figure S18. The N<sub>2</sub>-BET plots for (a) hydrotalcite (HT), (b) Fe/HT, (c) Mn/HT, (d) Ni/HT, (e) Fe-Mn/HT, (f) Fe-Ni/HT, (g) Mn-Ni/HT, and (h) Fe-Mn-Ni/HT.

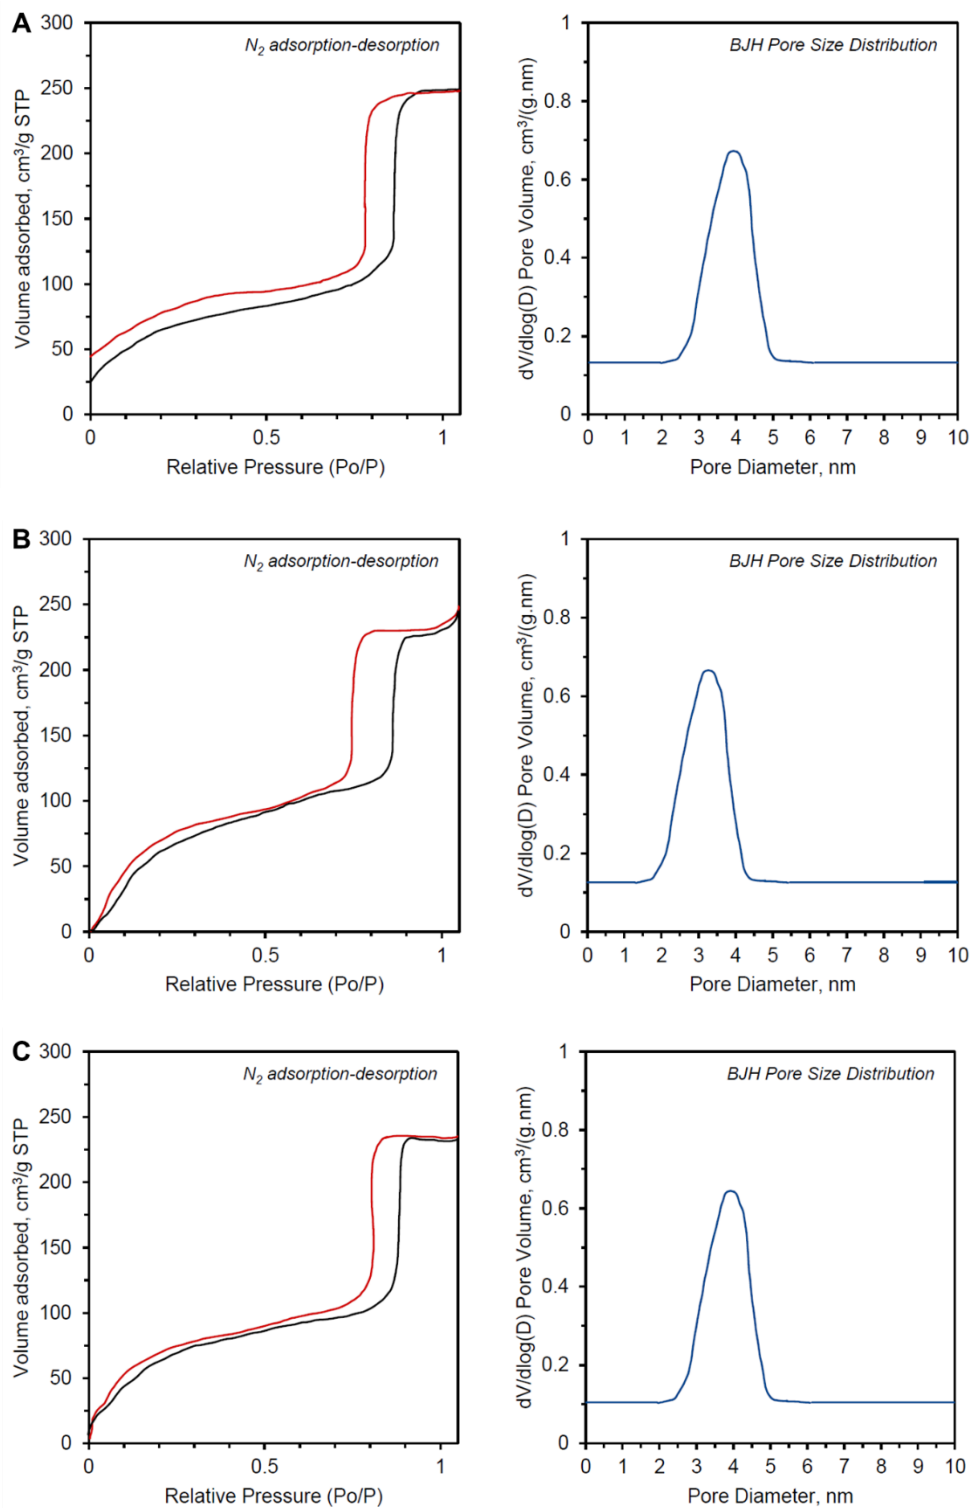

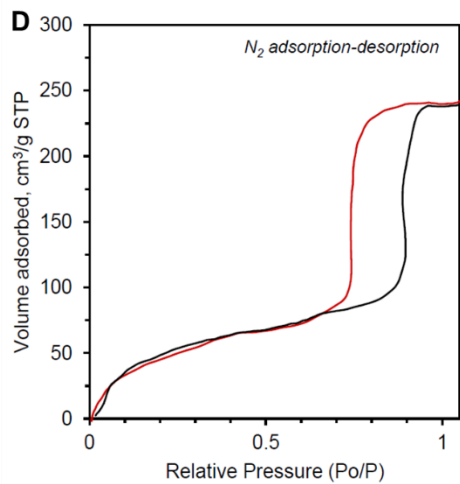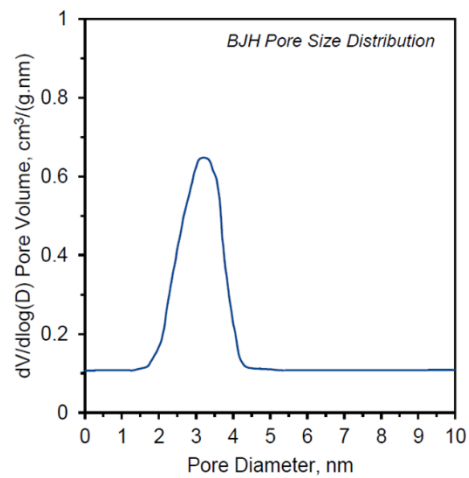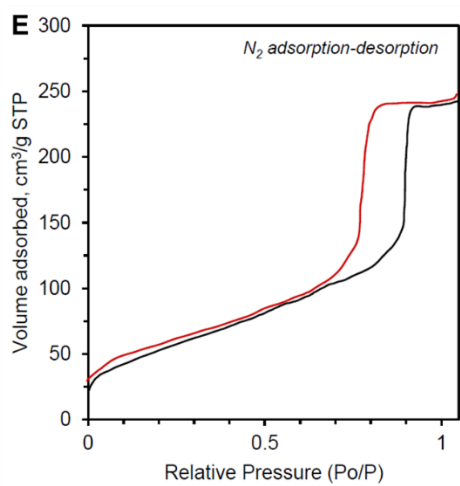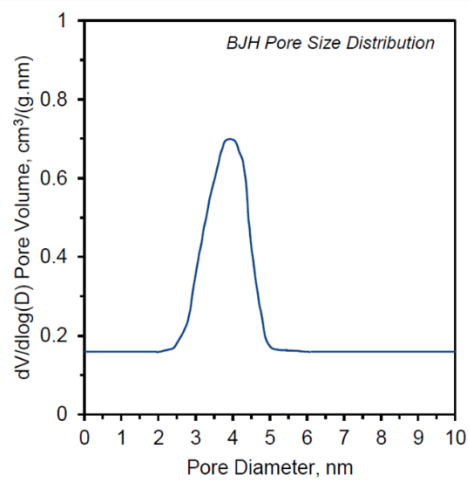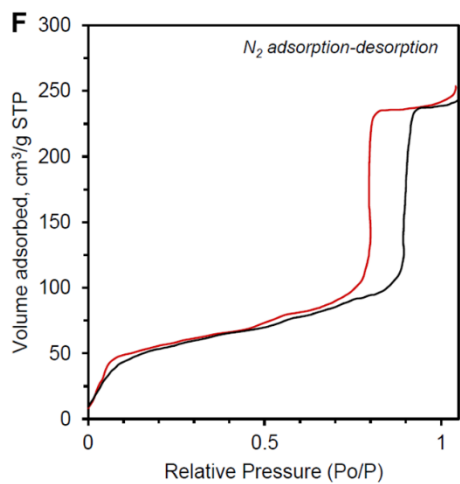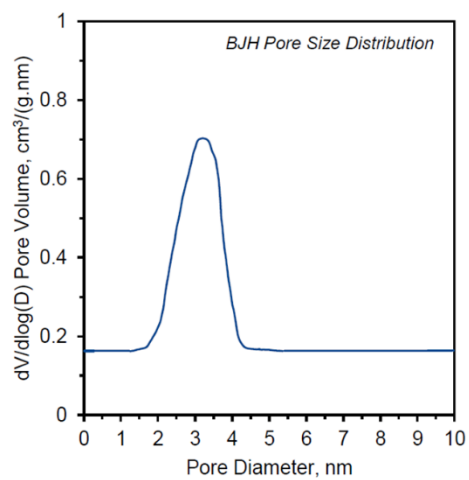

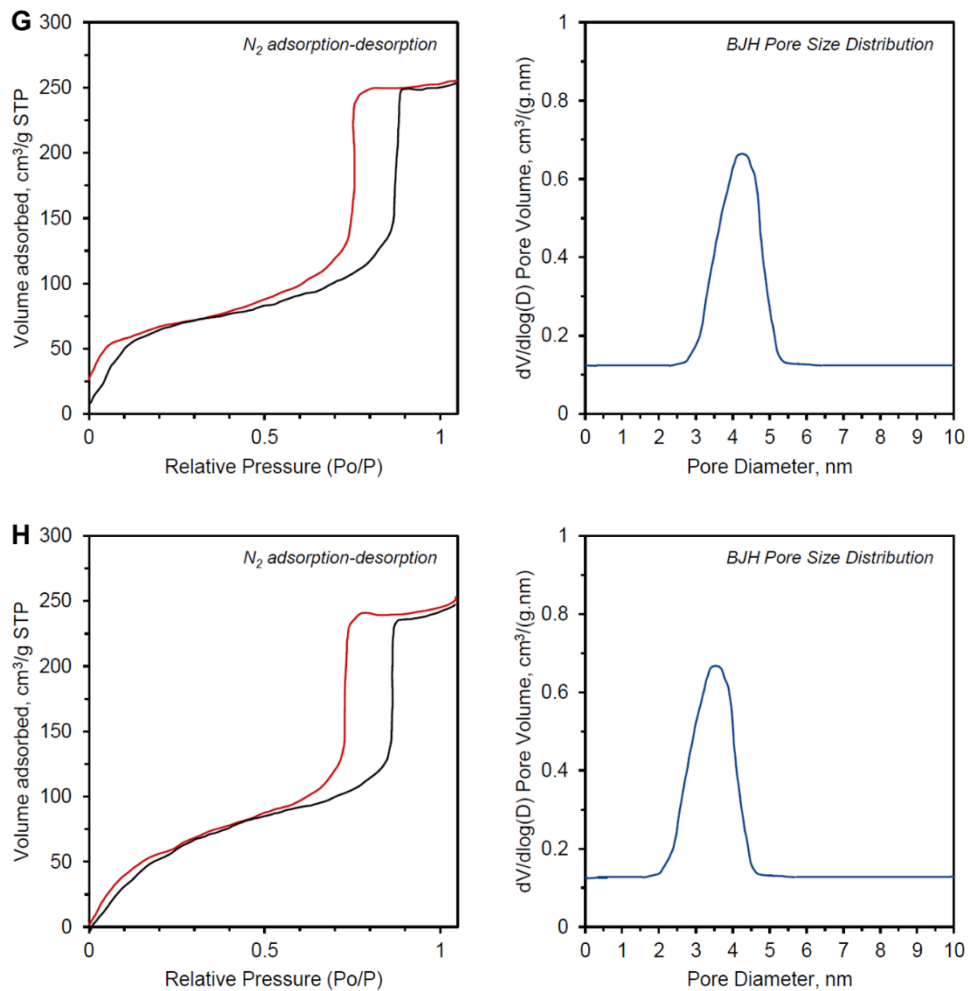

Figure S19. The  $N_2$ -BET plots for (a) Fe/HT, (b) Mn/HT, (c) Ni/HT, (d) Fe-Mn/HT, (e) Fe-Ni/HT, (f) Mn-Ni/HT, and (g) Fe-Mn-Ni/HT after being used for producing syngas.

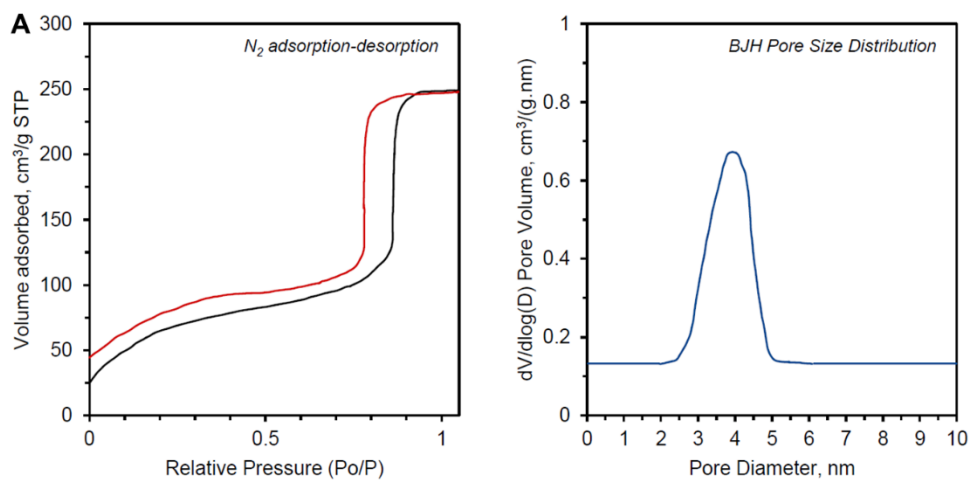



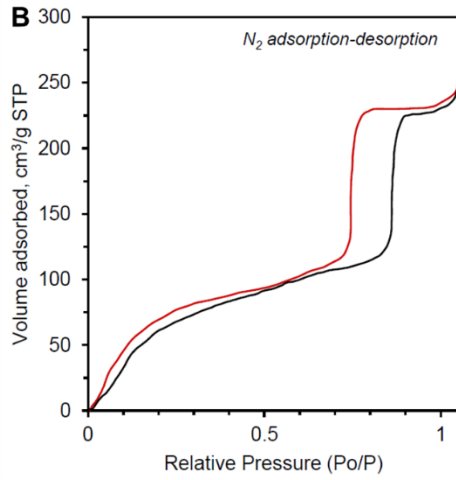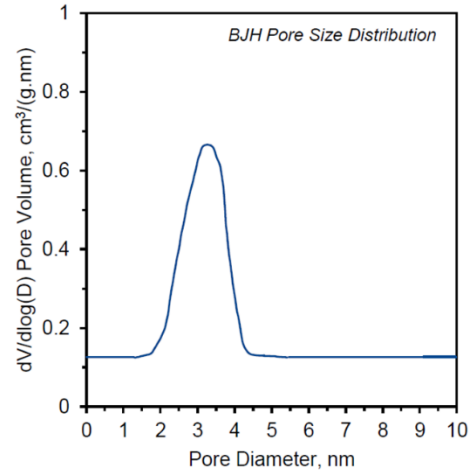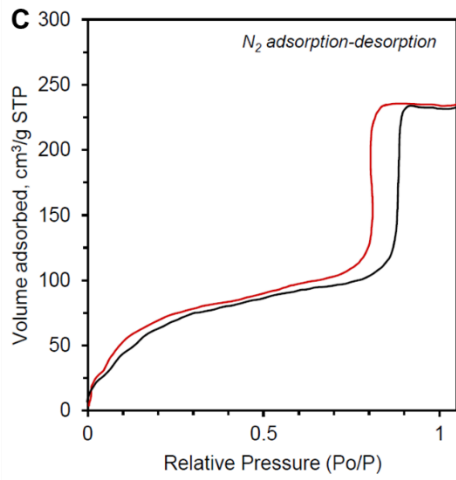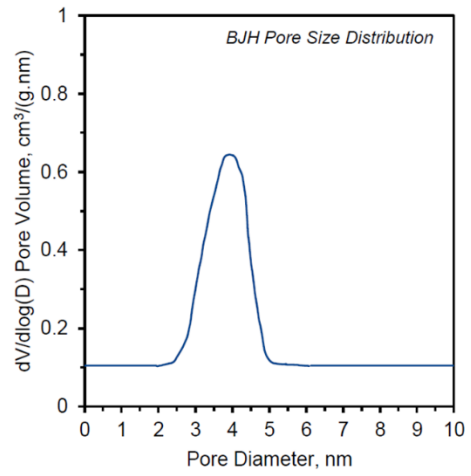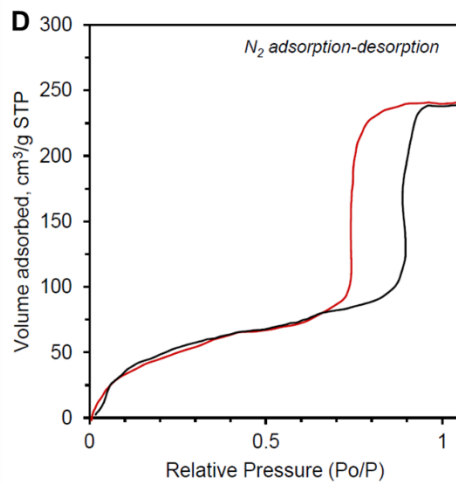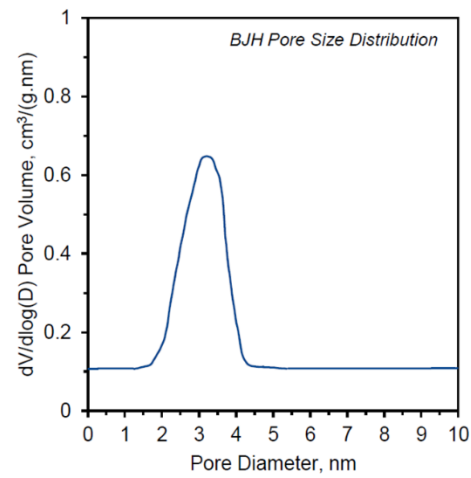

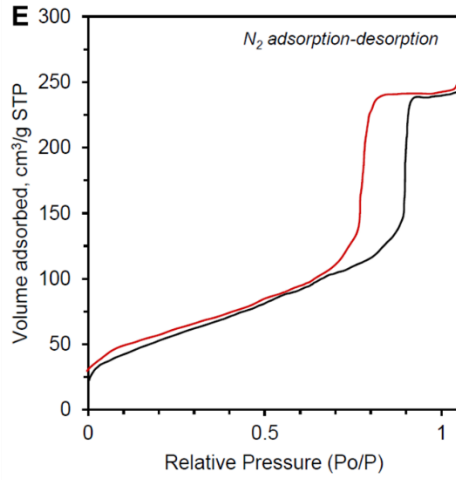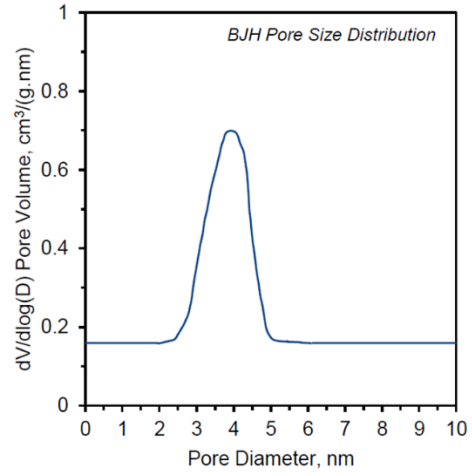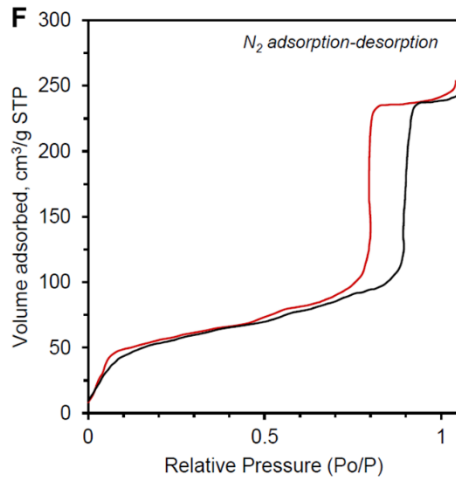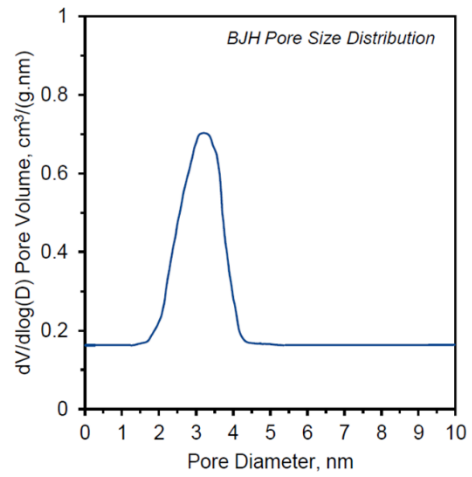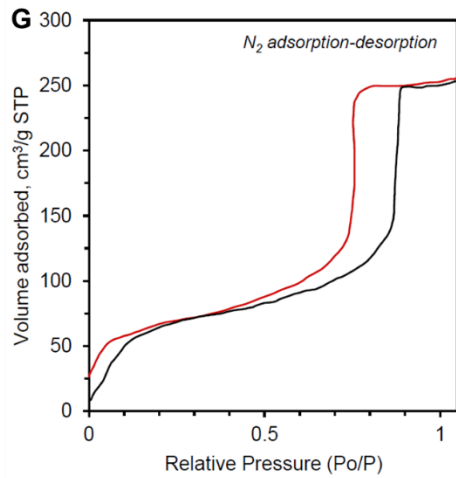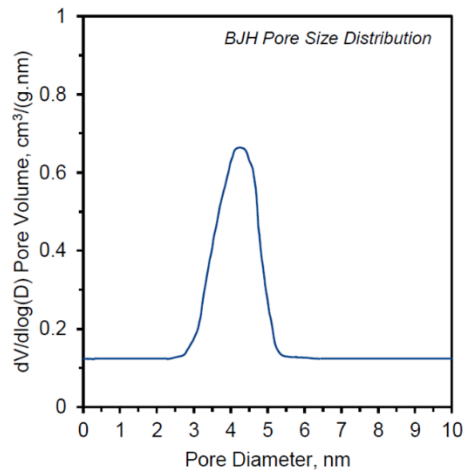

Figure S20. The  $\text{NH}_3$ -TPD and  $\text{CO}_2$ -TPD plots for (a) hydrotalcite (HT), (b) Fe/HT, (c) Mn/HT, (d) Ni/HT, (e) Fe-Mn/HT, (f) Fe-Ni/HT, (g) Mn-Ni/HT, and (h) Fe-Mn-Ni/HT.

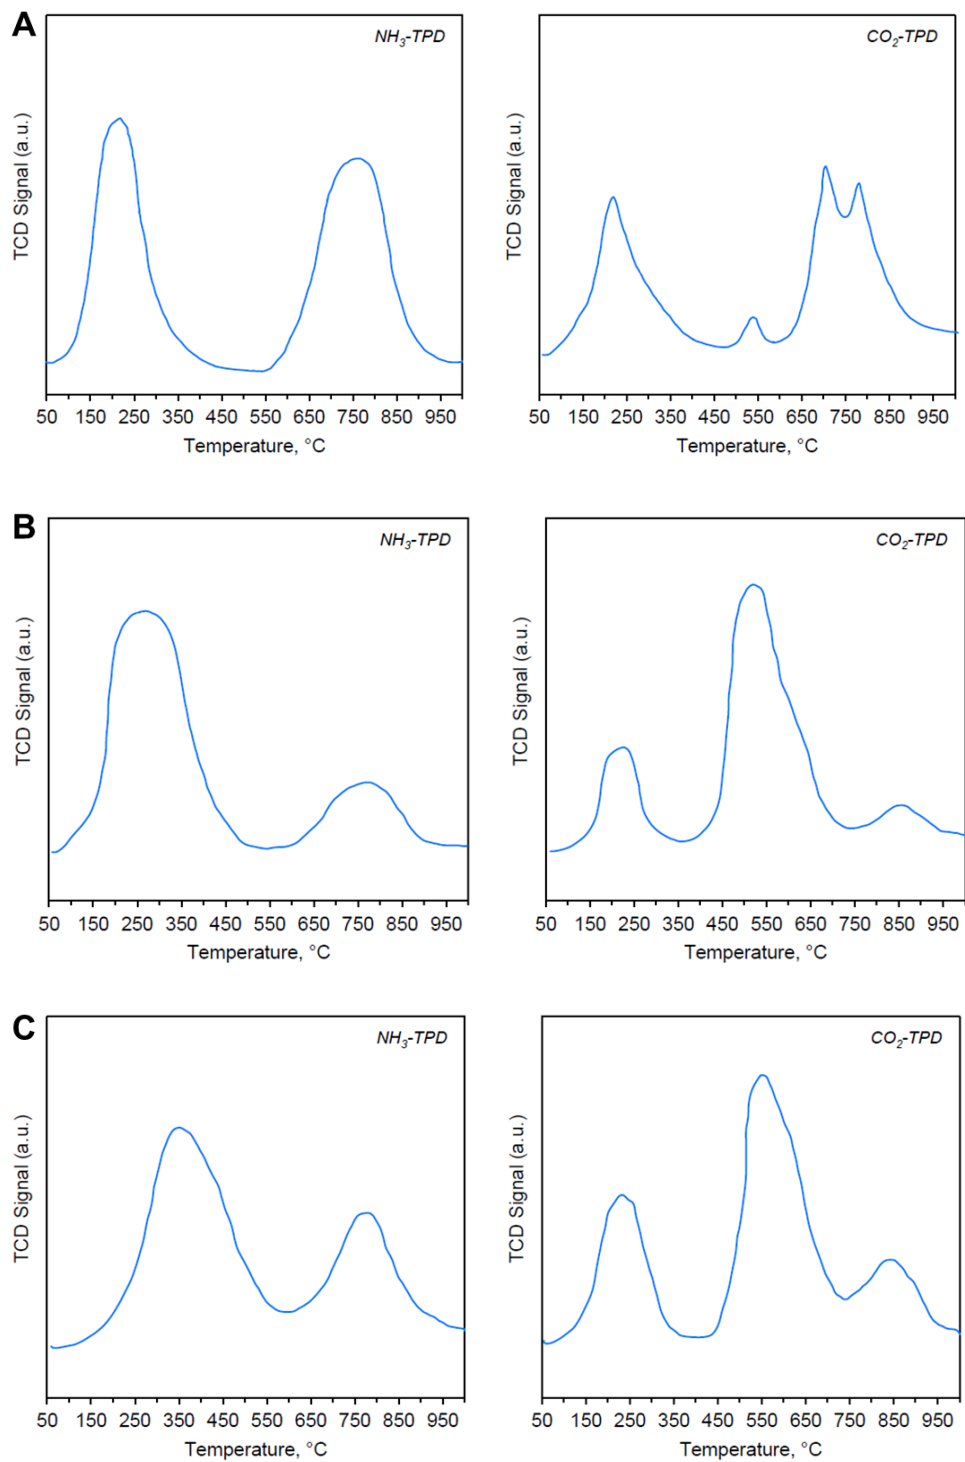

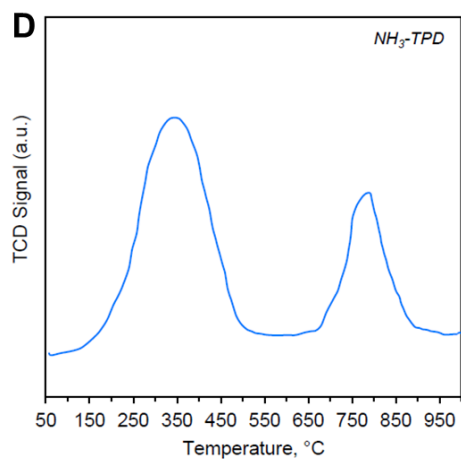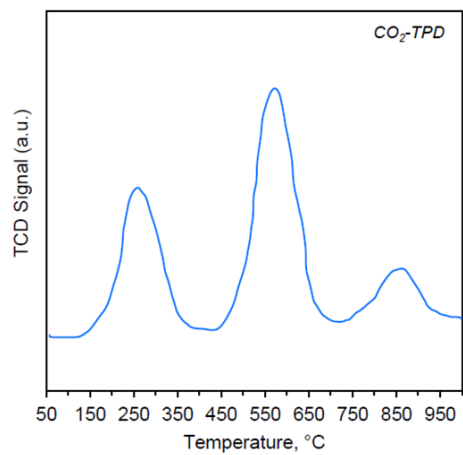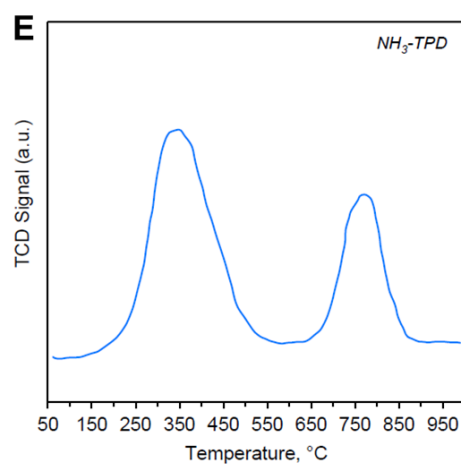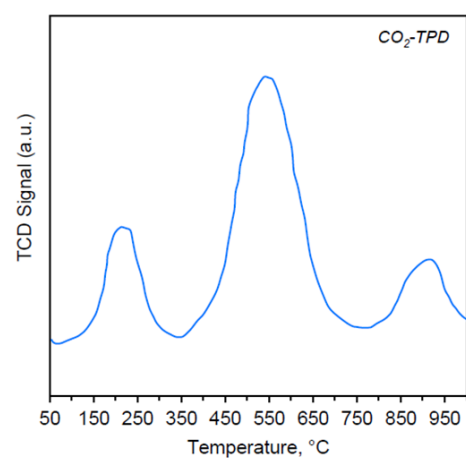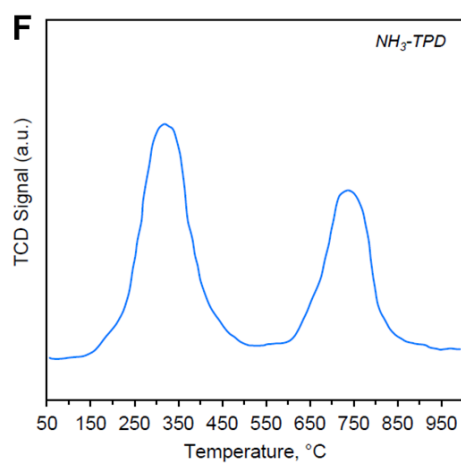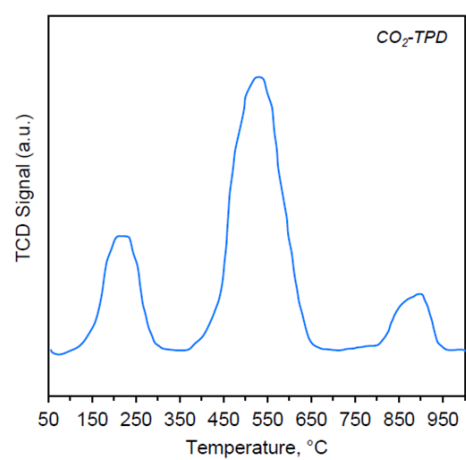

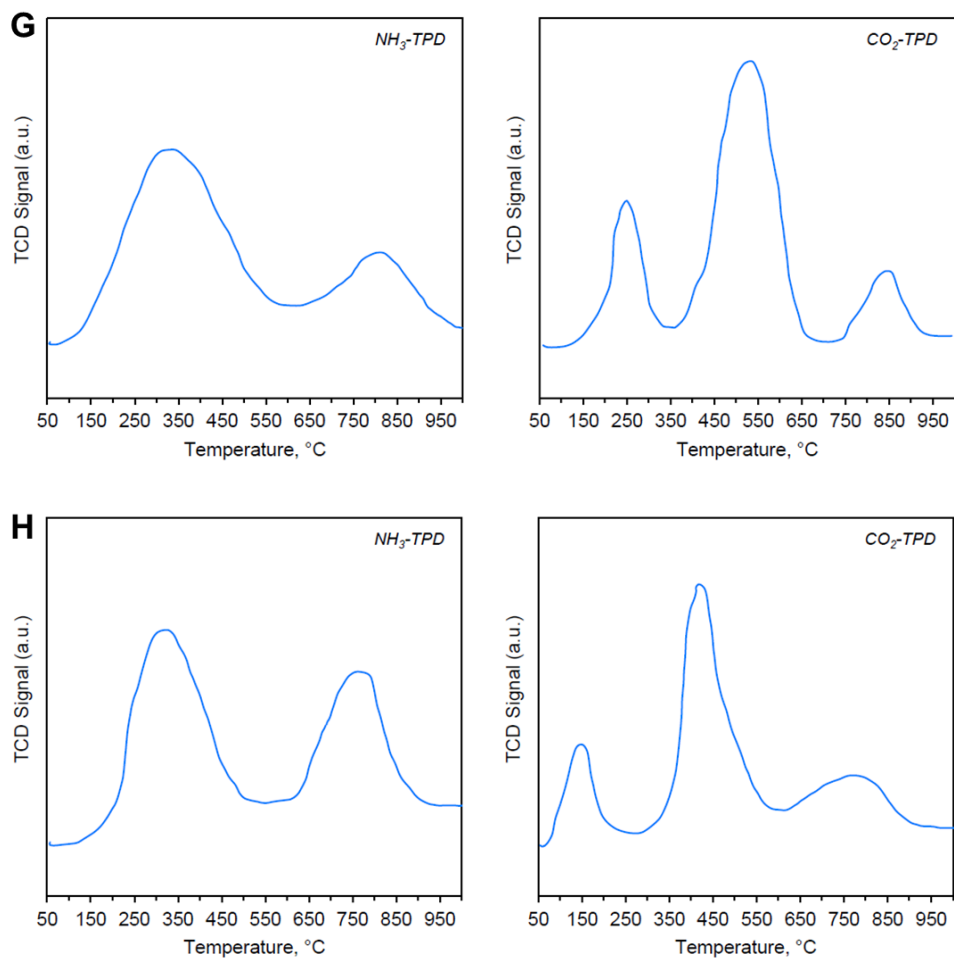

Figure S21. The  $\text{NH}_3$ -TPD and  $\text{CO}_2$ -TPD plots for (a) Fe/HT, (b) Mn/HT, (c) Ni/HT, (d) Fe-Mn/HT, (e) Fe-Ni/HT, (f) Mn-Ni/HT, and (g) Fe-Mn-Ni/HT after being used for producing syngas.

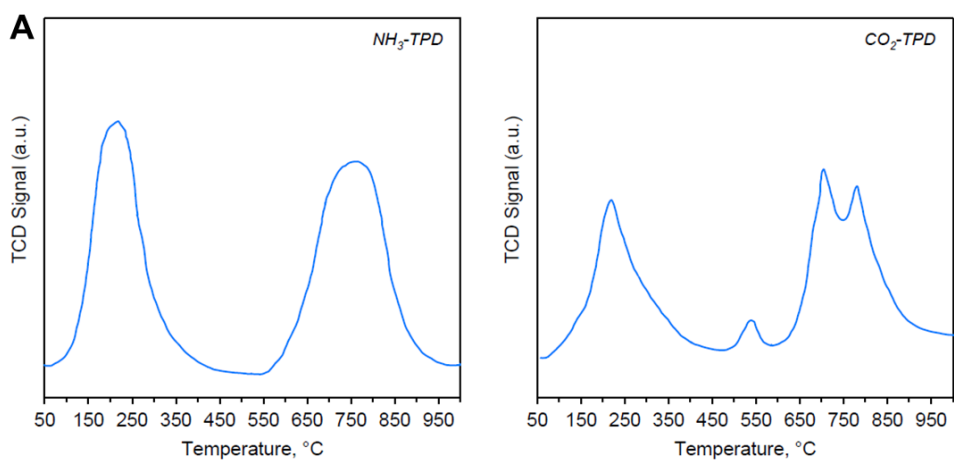

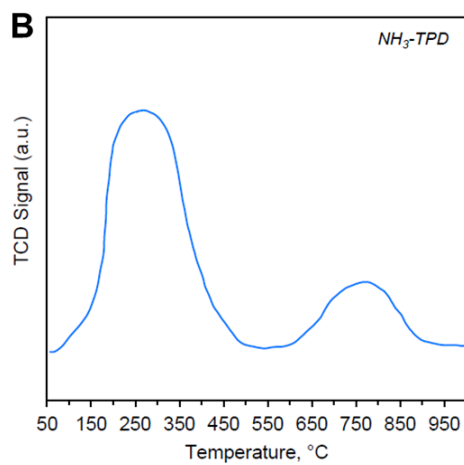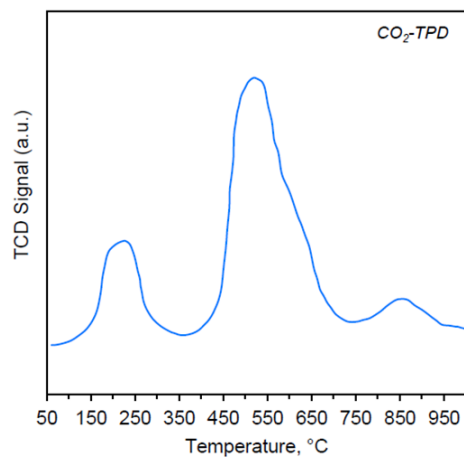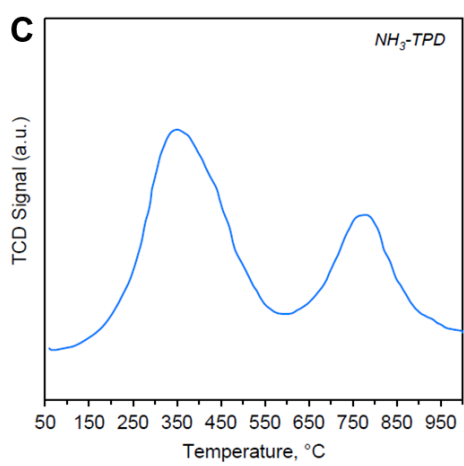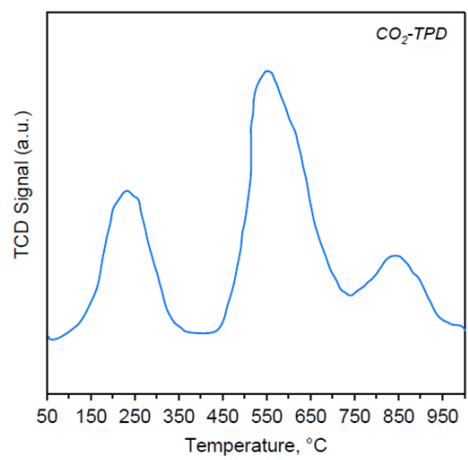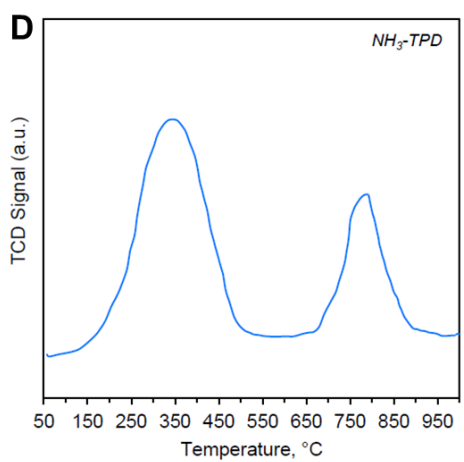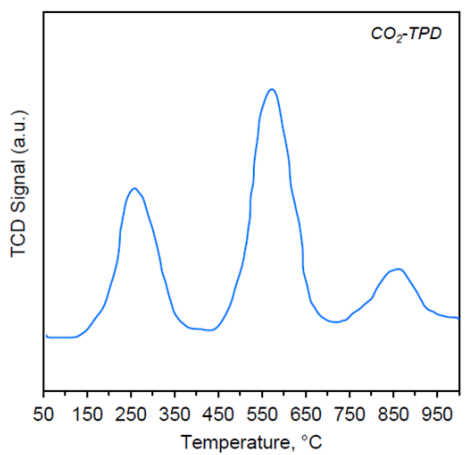

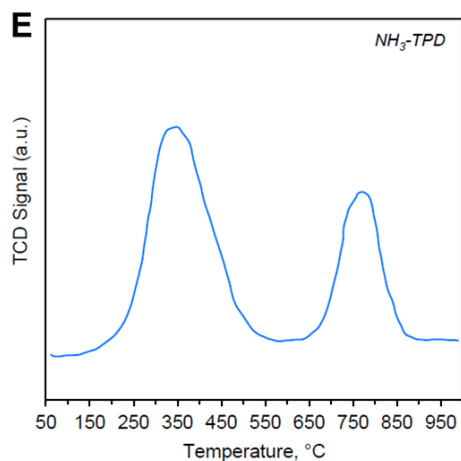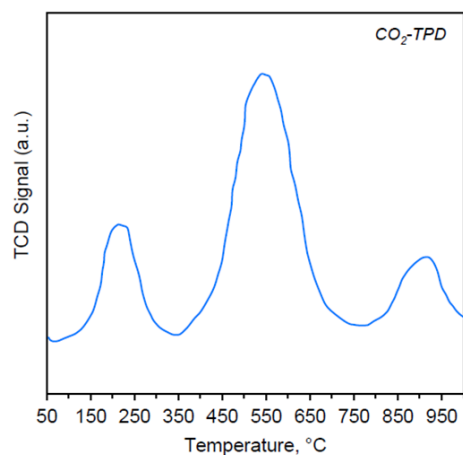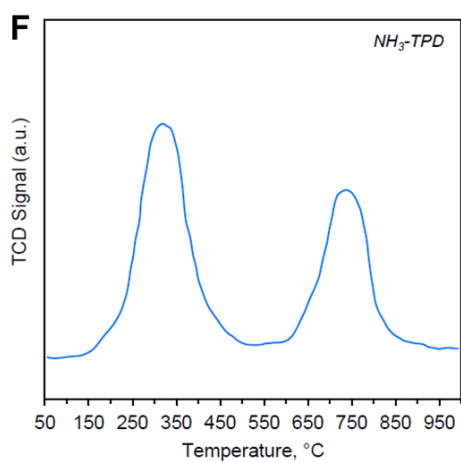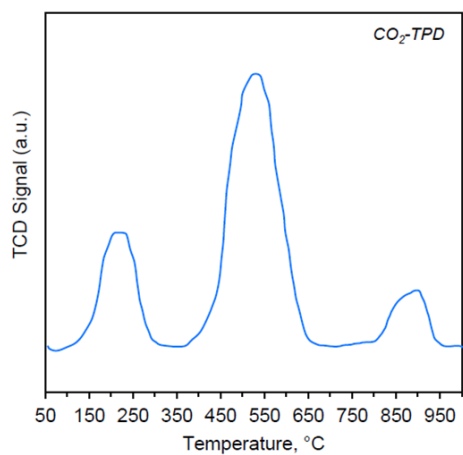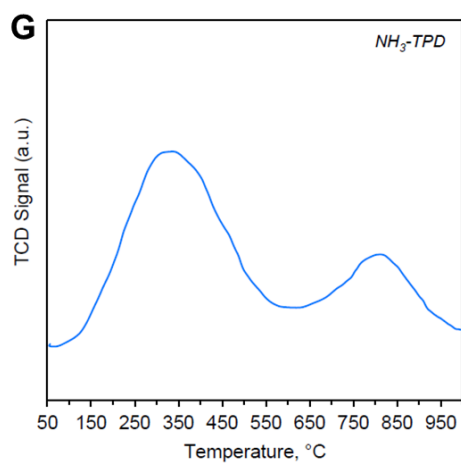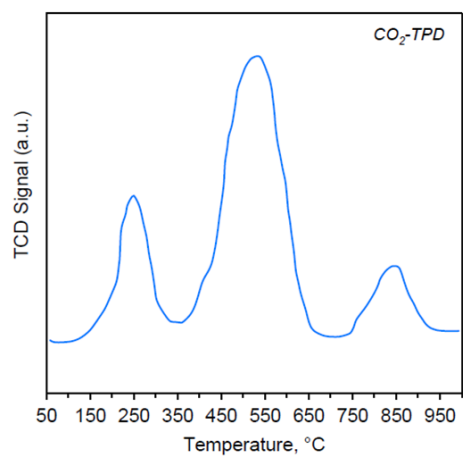

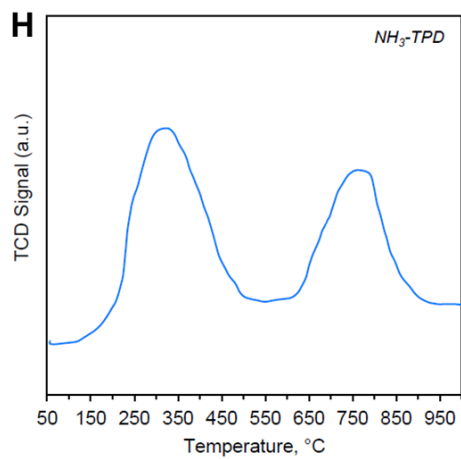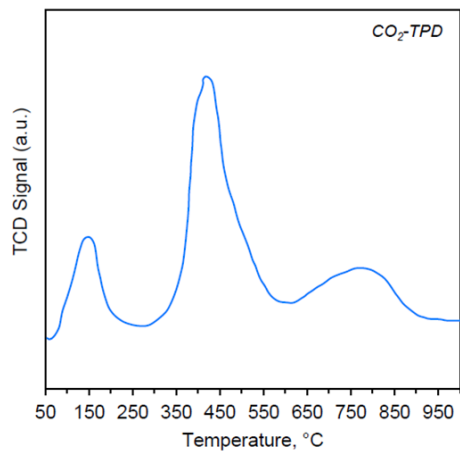



Table S1. The examined weight percents of first-row transition metals from the total 20 wt% active metal content on hydrotalcite according to the definitive screening design (DSD).

| Catalyst Number | Sc   | Ti   | V    | Cr   | Mn   | Fe   | Co   | Ni   | Cu   | Zn   |
|-----------------|------|------|------|------|------|------|------|------|------|------|
| 1               | 50%  | 100% | 100% | 100% | 100% | 100% | 100% | 100% | 100% | 100% |
| 2               | 50%  | 0%   | 0%   | 0%   | 0%   | 0%   | 0%   | 0%   | 0%   | 0%   |
| 3               | 100% | 50%  | 0%   | 0%   | 100% | 0%   | 100% | 100% | 100% | 0%   |
| 4               | 0%   | 50%  | 100% | 100% | 0%   | 100% | 0%   | 0%   | 0%   | 100% |
| 5               | 100% | 0%   | 50%  | 0%   | 100% | 100% | 0%   | 100% | 0%   | 100% |
| 6               | 0%   | 100% | 50%  | 100% | 0%   | 0%   | 100% | 0%   | 100% | 0%   |
| 7               | 100% | 0%   | 0%   | 50%  | 0%   | 100% | 100% | 0%   | 100% | 100% |
| 8               | 0%   | 100% | 100% | 50%  | 100% | 0%   | 0%   | 100% | 0%   | 0%   |
| 9               | 100% | 100% | 100% | 0%   | 50%  | 0%   | 0%   | 0%   | 100% | 100% |
| 10              | 0%   | 0%   | 0%   | 100% | 50%  | 100% | 100% | 100% | 0%   | 0%   |
| 11              | 100% | 0%   | 100% | 100% | 0%   | 50%  | 0%   | 100% | 100% | 0%   |
| 12              | 0%   | 100% | 0%   | 0%   | 100% | 50%  | 100% | 0%   | 0%   | 100% |
| 13              | 100% | 100% | 0%   | 100% | 0%   | 0%   | 50%  | 100% | 0%   | 100% |
| 14              | 0%   | 0%   | 100% | 0%   | 100% | 100% | 50%  | 0%   | 100% | 0%   |
| 15              | 100% | 100% | 100% | 0%   | 0%   | 100% | 100% | 50%  | 0%   | 0%   |
| 16              | 0%   | 0%   | 0%   | 100% | 100% | 0%   | 0%   | 50%  | 100% | 100% |
| 17              | 100% | 100% | 0%   | 100% | 100% | 100% | 0%   | 0%   | 50%  | 0%   |
| 18              | 0%   | 0%   | 100% | 0%   | 0%   | 0%   | 100% | 100% | 50%  | 100% |
| 19              | 100% | 0%   | 100% | 100% | 100% | 0%   | 100% | 0%   | 0%   | 50%  |
| 20              | 0%   | 100% | 0%   | 0%   | 0%   | 100% | 0%   | 100% | 100% | 50%  |
| 21              | 50%  | 50%  | 50%  | 50%  | 50%  | 50%  | 50%  | 50%  | 50%  | 50%  |

Table S2. The examined weight percents of Fe, Mn, and Ni from the total 20 wt% active metal content on hydrotalcite according to the simplex centroid design (SCD).

| Catalyst Number | Fe     | Mn     | Ni     |
|-----------------|--------|--------|--------|
| 1               | 100%   | 0%     | 0%     |
| 2               | 0%     | 100%   | 0%     |
| 3               | 0%     | 0%     | 100%   |
| 4               | 50%    | 50%    | 0%     |
| 5               | 50%    | 0%     | 50%    |
| 6               | 0%     | 50%    | 50%    |
| 7               | 33.33% | 33.33% | 33.33% |
| 8               | 66.67% | 16.67% | 16.67% |
| 9               | 16.67% | 66.67% | 16.67% |
| 10              | 16.67% | 16.67% | 66.67% |

Table S3. Complete results for regression analysis on experimental data from the second-stage SCD experiment.

| Measured Responses                  | Fe     |          | Mn     |          | Ni     |          | Fe×Mn  |          | Fe×Ni  |          | Mn×Ni  |          | Fe×Mn×Ni |          |
|-------------------------------------|--------|----------|--------|----------|--------|----------|--------|----------|--------|----------|--------|----------|----------|----------|
|                                     | Coeff. | <i>p</i> | Coeff.   | <i>p</i> |
| <i>%TOC<sub>removal</sub></i> (%)   | 77.1   | 0.012    | 63.4   | 0.011    | 22.5   | 0.011    | 109    | 0.012    | 123.1  | 0.013    | 147.7  | 0.013    | -478     | 0.026    |
| <i>Y<sub>H2</sub></i> (%)           | 15.12  | 0.01     | 13.28  | 0.01     | 24.48  | 0.01     | 28     | 0.010    | 143.2  | 0.011    | 136.16 | 0.011    | 960      | 0.024    |
| <i>%H<sub>2</sub></i> (%)           | 11     | 0.01     | 6.55   | 0.01     | 18.5   | 0.01     | 7.15   | 0.010    | 99.05  | 0.012    | 88.65  | 0.012    | 490      | 0.028    |
| CO:H <sub>2</sub>                   | 0.43   | 0.011    | 1.16   | 0.011    | 0.64   | 0.01     | 0.98   | 0.011    | -0.54  | 0.011    | 2.9    | 0.014    | -7.8     | 0.024    |
| SBrA (mmol NH <sub>3</sub> /g)      | 0.77   | 0.012    | 0.66   | 0.012    | 0.33   | 0.01     | 0.88   | 0.012    | 0.99   | 0.013    | 1.19   | 0.013    | -3.83    | 0.025    |
| WBrA (mmol NH <sub>3</sub> /g)      | 0.43   | 0.012    | 0.36   | 0.011    | 0.13   | 0.011    | 0.61   | 0.012    | 0.69   | 0.013    | 0.83   | 0.013    | -2.69    | 0.024    |
| SLA (mmol NH <sub>3</sub> /g)       | 0.24   | 0.011    | 0.54   | 0.012    | 0.33   | 0.011    | 0.4    | 0.011    | 1.18   | 0.014    | 0.22   | 0.011    | -3.19    | 0.023    |
| WLA (mmol NH <sub>3</sub> /g)       | 0.18   | 0.01     | 0.17   | 0.01     | 0.25   | 0.011    | 0.22   | 0.010    | 1.12   | 0.011    | 1.07   | 0.011    | 7.52     | 0.028    |
| SBS (mmol CO <sub>2</sub> /g)       | 0.28   | 0.016    | 0.29   | 0.016    | 0.42   | 0.018    | -0.03  | 0.009    | 0.05   | 0.011    | 0.06   | 0.011    | -0.47    | 0.026    |
| Phenols conversion                  | 0.75   | 0.012    | 0.64   | 0.012    | 0.37   | 0.01     | 0.82   | 0.012    | 1.09   | 0.013    | 0.99   | 0.013    | -3.47    | 0.028    |
| Acid content (mol.L <sup>-1</sup> ) | 0.46   | 0.012    | 0.35   | 0.011    | 0.15   | 0.01     | 0.62   | 0.012    | 0.74   | 0.013    | 0.9    | 0.014    | -2.55    | 0.022    |

Table S4. Physicochemical properties of ten different catalysts defined by the simplex centroid design protocol in Table S2.

| Active Metals                                              | $S_{BET}$ (m <sup>2</sup> /g) | $d_{BJH}$ (nm) | $V_{BJH}$ (cm <sup>3</sup> /g) | Isotherm and Hysteresis Types | TAS by NH <sub>3</sub> -TPD (mmol NH <sub>3</sub> /g) | TBS by CO <sub>2</sub> -TPD (mmol CO <sub>2</sub> /g) |
|------------------------------------------------------------|-------------------------------|----------------|--------------------------------|-------------------------------|-------------------------------------------------------|-------------------------------------------------------|
| Fe                                                         | 158.20                        | 8.86           | 1.14                           | IV–H1                         | 1.57                                                  | 0.46                                                  |
| Mn                                                         | 183.32                        | 7.83           | 1.11                           | IV–H1                         | 1.64                                                  | 0.42                                                  |
| Ni                                                         | 149.97                        | 8.16           | 1.18                           | IV–H1                         | 1.10                                                  | 0.54                                                  |
| Fe <sub>0.5</sub> -Mn <sub>0.5</sub>                       | 175.44                        | 8.62           | 1.17                           | IV–H1                         | 2.06                                                  | 0.40                                                  |
| Fe <sub>0.5</sub> -Ni <sub>0.5</sub>                       | 166.34                        | 8.2            | 1.09                           | IV–H1                         | 2.33                                                  | 0.50                                                  |
| Mn <sub>0.5</sub> -Ni <sub>0.5</sub>                       | 183.26                        | 8.03           | 1.10                           | IV–H1                         | 2.18                                                  | 0.52                                                  |
| Fe <sub>0.33</sub> -Mn <sub>0.33</sub> -Ni <sub>0.33</sub> | 188.93                        | 8.53           | 1.05                           | IV–H1                         | 2.20                                                  | 0.47                                                  |
| Fe <sub>0.67</sub> -Mn <sub>0.17</sub> -Ni <sub>0.17</sub> | 203.71                        | 7.98           | 1.03                           | IV–H1                         | 2.50                                                  | 0.46                                                  |
| Fe <sub>0.17</sub> -Mn <sub>0.67</sub> -Ni <sub>0.17</sub> | 190.57                        | 8.97           | 1.03                           | IV–H1                         | 2.57                                                  | 0.41                                                  |
| Fe <sub>0.17</sub> -Mn <sub>0.17</sub> -Ni <sub>0.67</sub> | 135.91                        | 8.49           | 1.16                           | IV–H1                         | 1.96                                                  | 0.55                                                  |

Table S5. Active sites composition of ten different catalysts defined by the simplex centroid design protocol in Table S2. Acidic site is expressed as mmol NH<sub>3</sub>/g and basic site is expressed as mmol CO<sub>2</sub>/g.

| Active Metals                                              | SBrA | WBrA | SLA  | WLA  | TAS  | SBS  | MBS  | WBS  | TBS  |
|------------------------------------------------------------|------|------|------|------|------|------|------|------|------|
| Fe                                                         | 0.75 | 0.42 | 0.24 | 0.16 | 1.57 | 0.28 | 0.09 | 0.09 | 0.46 |
| Mn                                                         | 0.63 | 0.34 | 0.54 | 0.13 | 1.64 | 0.29 | 0.06 | 0.07 | 0.42 |
| Ni                                                         | 0.35 | 0.14 | 0.33 | 0.28 | 1.10 | 0.42 | 0.08 | 0.04 | 0.54 |
| Fe <sub>0.5</sub> -Mn <sub>0.5</sub>                       | 0.89 | 0.52 | 0.49 | 0.17 | 2.06 | 0.28 | 0.08 | 0.04 | 0.40 |
| Fe <sub>0.5</sub> -Ni <sub>0.5</sub>                       | 0.80 | 0.46 | 0.58 | 0.50 | 2.33 | 0.36 | 0.08 | 0.06 | 0.50 |
| Mn <sub>0.5</sub> -Ni <sub>0.5</sub>                       | 0.78 | 0.44 | 0.49 | 0.47 | 2.18 | 0.37 | 0.06 | 0.09 | 0.52 |
| Fe <sub>0.33</sub> -Mn <sub>0.33</sub> -Ni <sub>0.33</sub> | 0.71 | 0.39 | 0.45 | 0.65 | 2.20 | 0.32 | 0.09 | 0.06 | 0.47 |
| Fe <sub>0.67</sub> -Mn <sub>0.17</sub> -Ni <sub>0.17</sub> | 0.92 | 0.54 | 0.43 | 0.61 | 2.50 | 0.30 | 0.07 | 0.09 | 0.46 |
| Fe <sub>0.17</sub> -Mn <sub>0.67</sub> -Ni <sub>0.17</sub> | 0.91 | 0.53 | 0.49 | 0.63 | 2.57 | 0.30 | 0.06 | 0.05 | 0.41 |
| Fe <sub>0.17</sub> -Mn <sub>0.17</sub> -Ni <sub>0.67</sub> | 0.61 | 0.33 | 0.46 | 0.56 | 1.96 | 0.39 | 0.07 | 0.09 | 0.55 |

Table S6. Summary of XPS results for oxidation states and chemical bonds associated with active metals on hydrotalcite.

| Impregnated Metals                                | Binding Energy (eV)  | Peak                 | State                |
|---------------------------------------------------|----------------------|----------------------|----------------------|
| Fe                                                | 74.5                 | Al 2p                | Aluminum oxide       |
|                                                   | 50.5                 | Mg 2p                | Magnesium oxide      |
|                                                   | 709.6                | Fe 2p <sub>3/2</sub> | Iron(II) oxide       |
|                                                   | 710.6                | Fe 2p <sub>3/2</sub> | Iron(III) oxide      |
| Mn                                                | 74.5                 | Al 2p                | Aluminum oxide       |
|                                                   | 50.5                 | Mg 2p                | Magnesium oxide      |
|                                                   | 640.5                | Mn 2p <sub>3/2</sub> | Manganese(III) oxide |
|                                                   | 653.3                | Mn 2p <sub>1/2</sub> | Manganese(IV) oxide  |
| Ni                                                | 74.5                 | Al 2p                | Aluminum oxide       |
|                                                   | 50.5                 | Mg 2p                | Magnesium oxide      |
|                                                   | 855.6                | Ni 2p <sub>3/2</sub> | Nickel(II) hydroxide |
| Fe <sub>0.5</sub> -Mn <sub>0.5</sub>              | 74.5                 | Al 2p                | Aluminum oxide       |
|                                                   | 50.5                 | Mg 2p                | Magnesium oxide      |
|                                                   | 50.5                 | Mg 2p                | Magnesium oxide      |
|                                                   | 710                  | Fe 2p <sub>3/2</sub> | Iron(II) oxide       |
|                                                   | 640.5                | Mn 2p <sub>3/2</sub> | Manganese(III) oxide |
|                                                   | 653.3                | Mn 2p <sub>1/2</sub> | Manganese(IV) oxide  |
| Fe <sub>0.5</sub> -Ni <sub>0.5</sub>              | 74.5                 | Al 2p                | Aluminum oxide       |
|                                                   | 50.5                 | Mg 2p                | Magnesium oxide      |
|                                                   | 709.6                | Fe 2p <sub>3/2</sub> | Iron(II) oxide       |
|                                                   | 710.6                | Fe 2p <sub>3/2</sub> | Iron(III) oxide      |
|                                                   | 855.6                | Ni 2p <sub>3/2</sub> | Nickel(II) hydroxide |
| Mn <sub>0.5</sub> -Ni <sub>0.5</sub>              | 74.5                 | Al 2p                | Aluminum oxide       |
|                                                   | 50.5                 | Mg 2p                | Magnesium oxide      |
|                                                   | 640.5                | Mn 2p <sub>3/2</sub> | Manganese(III) oxide |
|                                                   | 653.3                | Mn 2p <sub>1/2</sub> | Manganese(IV) oxide  |
|                                                   | 855.6                | Ni 2p <sub>3/2</sub> | Nickel(II) hydroxide |
| Fe <sub>x</sub> -Mn <sub>y</sub> -Ni <sub>z</sub> | 74.5                 | Al 2p                | Aluminum oxide       |
|                                                   | 50.5                 | Mg 2p                | Magnesium oxide      |
|                                                   | 640.5                | Mn 2p <sub>3/2</sub> | Manganese(III) oxide |
|                                                   | 653.3                | Mn 2p <sub>1/2</sub> | Manganese(IV) oxide  |
|                                                   | 855.6                | Ni 2p <sub>3/2</sub> | Nickel(II) hydroxide |
|                                                   | 709.6                | Fe 2p <sub>3/2</sub> | Iron(II) oxide       |
| 710.6                                             | Fe 2p <sub>3/2</sub> | Iron(III) oxide      |                      |

Table S7. Chemical concentration of the aqueous products from the SCD experiments using ten different catalysts defined in Table S2.

| Compounds                                     |                   | Catalyst Numbers Defined from SCD protocol |       |       |       |       |       |       |       |       |       |
|-----------------------------------------------|-------------------|--------------------------------------------|-------|-------|-------|-------|-------|-------|-------|-------|-------|
|                                               |                   | 1                                          | 2     | 3     | 4     | 5     | 6     | 7     | 8     | 9     | 10    |
| <b>GC-MS (mM)</b>                             | <b>RT (min)</b>   |                                            |       |       |       |       |       |       |       |       |       |
| <i>o</i> -cresol                              | 38.8              | 0.0                                        | 0.0   | 0.0   | 0.0   | 0.0   | 0.0   | 0.0   | 0.0   | 0.0   | 0.0   |
| 3-methyl catechol                             | 44.9              | 1.1                                        | 1.2   | 0.4   | 0.7   | 0.7   | 1.7   | 0.7   | 1.0   | 1.5   | 0.2   |
| (2Z,4Z)-2-methylhexa-2,4-dienedioic acid      | 56.9              | 2.4                                        | 2.5   | 0.8   | 1.4   | 1.4   | 3.7   | 1.4   | 2.0   | 3.2   | 0.4   |
| succinic acid                                 | 42.6              | 29.5                                       | 30.3  | 24.4  | 22.7  | 25.8  | 20.6  | 24.5  | 23.3  | 29.5  | 21.5  |
| propionic acid                                | 26.1              | 29.6                                       | 22.8  | 23.7  | 29.2  | 23.5  | 30.3  | 20.3  | 30.6  | 21.8  | 20.8  |
| 2-(5-oxo-2,5-dihydrofuran-2-yl)propanoic acid | 56.9              | 5.9                                        | 4.6   | 4.7   | 5.8   | 4.7   | 6.1   | 4.1   | 6.1   | 4.4   | 4.2   |
| <i>o</i> -chlorophenol                        | 46.5              | 0.0                                        | 0.0   | 0.0   | 0.0   | 0.0   | 0.0   | 0.0   | 0.0   | 0.0   | 0.0   |
| 2-chlorohydroquinone                          | 52.5              | 0.5                                        | 1.2   | 0.3   | 0.6   | 0.1   | 1.2   | 0.3   | 0.5   | 1.1   | 0.0   |
| (2E,4Z)-4-hydroxy-6-oxohexa-2,4-dienoic acid  | 51.6              | 0.7                                        | 0.3   | 0.9   | 0.3   | 1.3   | 0.5   | 3.1   | 1.3   | 2.1   | 1.3   |
| 2-nitrohydroquinone                           | 56.5              | 0.7                                        | 0.6   | 0.2   | 0.1   | 0.5   | 0.4   | 0.3   | 0.7   | 0.8   | 0.1   |
| <i>o</i> -nitrophenol                         | 50.5              | 0.0                                        | 0.0   | 0.0   | 0.0   | 0.0   | 0.0   | 0.0   | 0.0   | 0.0   | 0.0   |
| fumaric acid                                  | 41.8              | 18.4                                       | 16.1  | 18.2  | 16.3  | 16.5  | 18.2  | 19.3  | 15.1  | 18.4  | 17.5  |
| oxalic acid                                   | 32.0              | 3.7                                        | 3.2   | 3.6   | 3.3   | 3.3   | 3.6   | 3.9   | 3.0   | 3.7   | 3.5   |
| malonic acid                                  | 37.3              | 215.8                                      | 248.0 | 189.5 | 185.1 | 221.4 | 238.7 | 139.5 | 162.8 | 178.7 | 239.7 |
| acetic acid                                   | 20.8              | 5.4                                        | 6.2   | 4.7   | 4.6   | 5.5   | 6.0   | 3.5   | 4.1   | 4.5   | 6.0   |
| <b>Spectrophotometry (mM)</b>                 | <b>Wavelength</b> |                                            |       |       |       |       |       |       |       |       |       |
| hydrogen peroxide                             | 525 nm            | 0.5                                        | 0.2   | 0.7   | 0.5   | 0.4   | 1.0   | 0.5   | 0.4   | 0.8   | 0.3   |
| hydrochloric acid                             | 460 nm            | 135.5                                      | 137.3 | 133.7 | 143.5 | 130.5 | 134.6 | 149.8 | 136.4 | 131.8 | 144.6 |
| nitric acid                                   | 540 nm            | 134.2                                      | 139.4 | 142.7 | 144.3 | 149.1 | 138.2 | 150.3 | 134.4 | 149.3 | 135.7 |
| <b><math>\mu</math>GC (%v/v)</b>              | <b>RT (min)</b>   |                                            |       |       |       |       |       |       |       |       |       |
| hydrogen                                      | 26.3              | 7.5                                        | 5.5   | 17.5  | 8.5   | 35.0  | 32.5  | 35.0  | 32.5  | 45.5  | 37.5  |
| carbon dioxide                                | 37.4              | 76.0                                       | 89.0  | 58.0  | 82.2  | -5.0  | 46.4  | 11.3  | 6.8   | 28.6  | 7.5   |
| carbon monoxide                               | 44.5              | 16.5                                       | 5.5   | 24.5  | 9.4   | 70.0  | 21.1  | 53.7  | 60.7  | 25.9  | 55.0  |

Table S8. Time evolution of concentration of compounds in the aqueous product from semi-continuous processing of 0.15 M *o*-cresol.

| <b>200 °C</b> |        |       |       |       |       |       |                 |        |                |                               |
|---------------|--------|-------|-------|-------|-------|-------|-----------------|--------|----------------|-------------------------------|
| Hour(s)       | CRE    | MCA   | MHDA  | SUCCI | PROPI | DHFPA | CO <sub>2</sub> | CO     | H <sub>2</sub> | H <sub>2</sub> O <sub>2</sub> |
| 0             | 150.00 | 0.00  | 0.00  | 0.00  | 0.00  | 0.00  | 0.00            | 0.00   | 0.00           | 500.00                        |
| 1             | 75.00  | 37.50 | 31.43 | 0.61  | 0.61  | 3.33  | 4.29            | 472.91 | 573.16         | 400.00                        |
| 2             | 50.00  | 30.20 | 21.58 | 4.69  | 4.69  | 4.02  | 7.62            | 402.49 | 333.50         | 300.00                        |
| 3             | 40.00  | 17.25 | 11.38 | 5.69  | 5.69  | 4.17  | 10.58           | 424.44 | 450.75         | 200.00                        |
| 4             | 35.00  | 8.40  | 7.29  | 5.69  | 5.69  | 4.20  | 13.36           | 412.54 | 438.21         | 100.00                        |
| 5             | 30.00  | 0.31  | 5.06  | 5.69  | 5.69  | 4.21  | 16.02           | 420.17 | 454.67         | 50.00                         |
| 6             | 25.00  | 0.25  | 4.01  | 5.69  | 5.69  | 4.21  | 18.58           | 408.63 | 459.85         | 0.00                          |
| <b>250 °C</b> |        |       |       |       |       |       |                 |        |                |                               |
| Hour(s)       | CRE    | MCA   | MHDA  | SUCCI | PROPI | DHFPA | CO <sub>2</sub> | CO     | H <sub>2</sub> | H <sub>2</sub> O <sub>2</sub> |
| 0             | 150.00 | 0     | 0     | 0.00  | 0.00  | 0.00  | 0.00            | 0.00   | 0.00           | 500.00                        |
| 1             | 55.00  | 37.50 | 12.75 | 15.61 | 15.61 | 4.99  | 17.84           | 509.69 | 607.86         | 200.00                        |
| 2             | 25.00  | 30.20 | 10.40 | 19.69 | 19.69 | 7.00  | 30.48           | 425.78 | 503.18         | 100.00                        |
| 3             | 15.00  | 17.25 | 5.75  | 20.69 | 20.69 | 7.70  | 42.41           | 298.18 | 407.57         | 50.00                         |
| 4             | 10.00  | 8.40  | 3.60  | 20.69 | 20.69 | 8.00  | 53.85           | 255.60 | 404.18         | 25.00                         |
| 5             | 5.00   | 0.31  | 2.17  | 20.69 | 20.69 | 8.00  | 64.83           | 247.03 | 429.15         | 10.00                         |
| 6             | 2.00   | 0.25  | 1.86  | 20.69 | 20.69 | 8.00  | 75.36           | 271.52 | 443.72         | 0.00                          |
| <b>300 °C</b> |        |       |       |       |       |       |                 |        |                |                               |
| Hour(s)       | CRE    | MCA   | MHDA  | SUCCI | PROPI | DHFPA | CO <sub>2</sub> | CO     | H <sub>2</sub> | H <sub>2</sub> O <sub>2</sub> |
| 0             | 150.00 | 0.00  | 0     | 0.00  | 0.00  | 0.00  | 0.00            | 0      | 0              | 500.00                        |
| 1             | 45.00  | 37.50 | 10.75 | 21.09 | 21.09 | 8.72  | 55.35           | 358.03 | 587.79         | 150.00                        |
| 2             | 15.00  | 30.20 | 8.40  | 27.09 | 27.09 | 11.72 | 96.55           | 208.19 | 317.30         | 50.00                         |
| 3             | 8.00   | 17.25 | 3.75  | 29.09 | 29.09 | 12.72 | 130.92          | 175.19 | 449.58         | 25.00                         |
| 4             | 5.00   | 8.40  | 1.60  | 30.09 | 30.09 | 13.22 | 159.61          | 139.83 | 461.18         | 15.00                         |
| 5             | 2.00   | 0.31  | 0.17  | 30.59 | 30.59 | 13.52 | 183.58          | 117.64 | 500.06         | 5.00                          |
| 6             | 0.00   | 0.25  | 0.06  | 31.09 | 31.09 | 13.72 | 203.64          | 94.62  | 523.24         | 0.00                          |



Table S9. Time evolution of concentration of compounds in the aqueous product from semi-continuous processing of 0.15 M *o*-chlorophenol.

| <b>200 °C</b> |        |       |       |       |      |        |        |                               |                 |        |                |
|---------------|--------|-------|-------|-------|------|--------|--------|-------------------------------|-----------------|--------|----------------|
| Hour(s)       | ONP    | NHQ   | HODA  | FUMA  | OXAL | MALO   | ACETIC | H <sub>2</sub> O <sub>2</sub> | CO <sub>2</sub> | CO     | H <sub>2</sub> |
| 0             | 150.00 | 0.00  | 0.00  | 0.00  | 0.00 | 0.00   | 0.00   | 500.00                        | 0.00            | 0.00   | 0.00           |
| 1             | 110.00 | 14.00 | 11.00 | 10.67 | 7.40 | 288.50 | 0.69   | 400.00                        | 10.00           | 324.28 | 244.55         |
| 2             | 75.00  | 10.00 | 10.00 | 10.67 | 5.13 | 287.81 | 1.38   | 300.00                        | 17.77           | 555.59 | 661.36         |
| 3             | 50.00  | 9.00  | 8.00  | 10.67 | 3.55 | 287.12 | 2.07   | 200.00                        | 24.70           | 561.42 | 587.14         |
| 4             | 30.00  | 3.00  | 7.00  | 10.67 | 2.46 | 286.43 | 2.76   | 100.00                        | 31.18           | 573.26 | 614.58         |
| 5             | 15.00  | 2.00  | 6.50  | 10.67 | 1.70 | 285.75 | 3.45   | 50.00                         | 37.37           | 559.77 | 607.08         |
| 6             | 10.00  | 1.85  | 6.25  | 10.67 | 1.18 | 285.06 | 4.13   | 0.00                          | 43.36           | 564.30 | 609.57         |
| <b>250 °C</b> |        |       |       |       |      |        |        |                               |                 |        |                |
| Hour(s)       | ONP    | NHQ   | HODA  | FUMA  | OXAL | MALO   | ACETIC | H <sub>2</sub> O <sub>2</sub> | CO <sub>2</sub> | CO     | H <sub>2</sub> |
| 0             | 150.00 | 0.00  | 0.00  | 0.00  | 0.00 | 0.00   | 0.00   | 500.00                        | 0.00            | 0.00   | 0.00           |
| 1             | 100.00 | 10.00 | 12.00 | 6.28  | 2.71 | 279.71 | 7.93   | 200.00                        | 41.63           | 328.66 | 259.35         |
| 2             | 55.00  | 6.00  | 11.00 | 11.28 | 5.04 | 262.90 | 15.75  | 100.00                        | 71.12           | 448.83 | 401.23         |
| 3             | 30.00  | 4.40  | 7.60  | 13.28 | 3.00 | 250.21 | 20.44  | 50.00                         | 98.96           | 474.45 | 530.90         |
| 4             | 15.00  | 3.48  | 5.80  | 14.08 | 1.50 | 242.63 | 25.01  | 25.00                         | 125.66          | 411.34 | 566.85         |
| 5             | 5.00   | 2.42  | 4.21  | 14.18 | 1.00 | 237.18 | 28.47  | 10.00                         | 151.27          | 386.28 | 573.01         |
| 6             | 0.00   | 2.22  | 1.15  | 14.28 | 1.00 | 251.83 | 33.81  | 0.00                          | 175.84          | 374.96 | 588.19         |
| <b>300 °C</b> |        |       |       |       |      |        |        |                               |                 |        |                |
| Hour(s)       | ONP    | NHQ   | HODA  | FUMA  | OXAL | MALO   | ACETIC | H <sub>2</sub> O <sub>2</sub> | CO <sub>2</sub> | CO     | H <sub>2</sub> |
| 0             | 150.00 | 0.00  | 0.00  | 0.00  | 0.00 | 0.00   | 0.00   | 500.00                        | 0.00            | 0.00   | 0.00           |
| 1             | 65.00  | 20.00 | 15.00 | 18.11 | 0.00 | 248.54 | 33.31  | 150.00                        | 129.15          | 245.51 | 250.79         |
| 2             | 30.00  | 17.00 | 12.00 | 18.11 | 0.00 | 219.16 | 62.68  | 50.00                         | 225.29          | 287.38 | 629.24         |
| 3             | 15.00  | 15.00 | 6.00  | 18.11 | 0.00 | 193.26 | 88.58  | 25.00                         | 305.48          | 231.73 | 585.61         |
| 4             | 5.00   | 5.00  | 3.00  | 18.11 | 0.00 | 170.42 | 111.43 | 15.00                         | 372.42          | 194.30 | 646.80         |
| 5             | 1.00   | 1.00  | 2.00  | 18.11 | 0.00 | 150.27 | 131.57 | 5.00                          | 428.36          | 156.72 | 667.69         |
| 6             | 0.00   | 0.00  | 1.00  | 18.11 | 0.00 | 132.51 | 149.33 | 0.00                          | 475.15          | 130.66 | 693.59         |

Table S10. Time evolution of concentration of compounds in the aqueous product from semi-continuous processing of 0.15 M *o*-nitrophenol.

| <b>200 °C</b> |        |       |       |       |      |        |        |                               |                 |        |                |
|---------------|--------|-------|-------|-------|------|--------|--------|-------------------------------|-----------------|--------|----------------|
| Hour(s)       | CLP    | CLH   | HODA  | FUMA  | OXAL | MALO   | ACETIC | H <sub>2</sub> O <sub>2</sub> | CO <sub>2</sub> | CO     | H <sub>2</sub> |
| 0             | 150.00 | 0.00  | 0.00  | 0.00  | 0.00 | 0.00   | 0.00   | 500.00                        | 0.00            | 0.00   | 0.00           |
| 1             | 110.00 | 14.00 | 8.00  | 10.67 | 7.40 | 288.50 | 0.69   | 400.00                        | 10.00           | 324.28 | 244.55         |
| 2             | 75.00  | 15.00 | 10.00 | 10.67 | 5.13 | 287.81 | 1.38   | 300.00                        | 17.77           | 555.59 | 661.36         |
| 3             | 50.00  | 9.00  | 8.00  | 10.67 | 3.55 | 287.12 | 2.07   | 200.00                        | 24.70           | 561.42 | 587.14         |
| 4             | 30.00  | 3.00  | 7.00  | 10.67 | 2.46 | 286.43 | 2.76   | 100.00                        | 31.18           | 573.26 | 614.58         |
| 5             | 15.00  | 2.00  | 6.50  | 10.67 | 1.70 | 285.75 | 3.45   | 50.00                         | 37.37           | 559.77 | 607.08         |
| 6             | 10.00  | 1.85  | 6.25  | 10.67 | 1.18 | 285.06 | 4.13   | 0.00                          | 43.36           | 564.30 | 609.57         |
| <b>250 °C</b> |        |       |       |       |      |        |        |                               |                 |        |                |
| Hour(s)       | CLP    | CLH   | HODA  | FUMA  | OXAL | MALO   | ACETIC | H <sub>2</sub> O <sub>2</sub> | CO <sub>2</sub> | CO     | H <sub>2</sub> |
| 0             | 150.00 | 0.00  | 0.00  | 0.00  | 0.00 | 0.00   | 0.00   | 500.00                        | 0.00            | 0.00   | 0.00           |
| 1             | 100.00 | 15.00 | 10.00 | 6.28  | 2.71 | 279.71 | 7.93   | 200.00                        | 41.63           | 328.66 | 259.35         |
| 2             | 55.00  | 18.00 | 9.00  | 11.28 | 5.04 | 262.90 | 15.75  | 100.00                        | 71.12           | 448.83 | 401.23         |
| 3             | 30.00  | 11.00 | 6.80  | 13.28 | 3.00 | 250.21 | 20.44  | 50.00                         | 98.96           | 474.45 | 530.90         |
| 4             | 15.00  | 5.80  | 5.80  | 14.08 | 1.50 | 242.63 | 25.01  | 25.00                         | 125.66          | 411.34 | 566.85         |
| 5             | 5.00   | 3.63  | 5.21  | 14.18 | 1.00 | 237.18 | 28.47  | 10.00                         | 151.27          | 386.28 | 573.01         |
| 6             | 0.00   | 2.41  | 5.15  | 14.28 | 1.00 | 251.83 | 33.81  | 0.00                          | 175.84          | 374.96 | 588.19         |
| <b>300 °C</b> |        |       |       |       |      |        |        |                               |                 |        |                |
| Hour(s)       | CLP    | CLH   | HODA  | FUMA  | OXAL | MALO   | ACETIC | H <sub>2</sub> O <sub>2</sub> | CO <sub>2</sub> | CO     | H <sub>2</sub> |
| 0             | 150.00 | 0.00  | 0.00  | 0.00  | 0.00 | 0.00   | 0.00   | 500.00                        | 0.00            | 0.00   | 0.00           |
| 1             | 65.00  | 20.00 | 15.00 | 18.11 | 0.00 | 248.54 | 33.31  | 150.00                        | 129.15          | 245.51 | 250.79         |
| 2             | 30.00  | 22.00 | 12.00 | 18.11 | 0.00 | 219.16 | 62.68  | 50.00                         | 225.29          | 287.38 | 629.24         |
| 3             | 15.00  | 15.00 | 6.00  | 18.11 | 0.00 | 193.26 | 88.58  | 25.00                         | 305.48          | 231.73 | 585.61         |
| 4             | 5.00   | 5.00  | 3.00  | 18.11 | 0.00 | 170.42 | 111.43 | 15.00                         | 372.42          | 194.30 | 646.80         |
| 5             | 1.00   | 1.00  | 2.00  | 18.11 | 0.00 | 150.27 | 131.57 | 5.00                          | 428.36          | 156.72 | 667.69         |
| 6             | 0.00   | 0.00  | 1.00  | 18.11 | 0.00 | 132.51 | 149.33 | 0.00                          | 475.15          | 130.66 | 693.59         |

Table S11. The list of ordinary differential equations derived from unsteady-state mass balance of the reactants, intermediates, and products.

| Components                                    | Differential Equations Derived from Transient Mass Balance                                            |
|-----------------------------------------------|-------------------------------------------------------------------------------------------------------|
| <i>o</i> -cresol                              | $dC_{CRE}/dt = -r_1$                                                                                  |
| 3-methyl catechol                             | $dC_{MCA}/dt = r_1 - r_2$                                                                             |
| (2Z,4Z)-2-methylhexa-2,4-dienedioic acid      | $dC_{MHDA}/dt = r_2 - r_3 - r_4 - r_5 - r_6$                                                          |
| succinic acid                                 | $dC_{SUCCI}/dt = r_3$                                                                                 |
| propionic acid                                | $dC_{PROPI}/dt = r_3$                                                                                 |
| 2-(5-oxo-2,5-dihydrofuran-2-yl)propanoic acid | $dC_{DHFPA}/dt = r_4$                                                                                 |
| carbon dioxide                                | $dC_{CO2}/dt = 7 \times r_6 + r_{16} + r_{12} + r_{13}$                                               |
| carbon monoxide                               | $dC_{CO}/dt = 7 \times r_5 + 6 \times r_9 - r_{16}$                                                   |
| hydrogen                                      | $dC_{H2}/dt = 14 \times r_6 + 7 \times r_5 + 5 \times r_9 + r_2 - r_3 + r_{16}$                       |
| <i>o</i> -chlorophenol                        | $dC_{CLP}/dt = -r_7$                                                                                  |
| 2-chlorohydroquinone                          | $dC_{CLH}/dt = r_7 - r_8$                                                                             |
| (2E,4Z)-4-hydroxy-6-oxohexa-2,4-dienoic acid  | $dC_{HODA}/dt = r_8 + r_{15} - r_9 - r_{10} - r_{11}$                                                 |
| 2-nitrohydroquinone                           | $dC_{NHQ}/dt = r_{14} - r_{15}$                                                                       |
| <i>o</i> -nitrophenol                         | $dC_{ONP}/dt = -r_{14}$                                                                               |
| fumaric acid                                  | $dC_{FUMA}/dt = r_{11}$                                                                               |
| oxalic acid                                   | $dC_{OXALIC}/dt = r_{11} - r_{13}$                                                                    |
| malonic acid                                  | $dC_{MALONIC}/dt = r_{10} - r_{12}$                                                                   |
| acetic acid                                   | $dC_{ACETIC}/dt = r_{12}$                                                                             |
| hydrogen peroxide                             | $dC_{H2O2}/dt = -(r_1 + r_2 + r_3 + r_7 + r_8 + 2 \times r_{10} + 2 \times r_{11} + r_{14} + r_{15})$ |
| hydrochloric acid                             | $dC_{HCl}/dt = r_8$                                                                                   |
| nitric acid                                   | $dC_{HNO3}/dt = r_{14}$                                                                               |

Table S12. The physisorption and chemisorption properties of the optimized catalyst after each cycle.

| Cycle | $S_{BET}$<br>(m <sup>2</sup> /g) | SBrA<br>(mmol NH <sub>3</sub> /g) | SLA<br>(mmol NH <sub>3</sub> /g) | WBrA<br>(mmol NH <sub>3</sub> /g) | WLA<br>(mmol NH <sub>3</sub> /g) | TAS<br>(mmol NH <sub>3</sub> /g) |
|-------|----------------------------------|-----------------------------------|----------------------------------|-----------------------------------|----------------------------------|----------------------------------|
| 1     | 194.25                           | 0.8046                            | 0.4483                           | 0.4588                            | 0.7045                           | 2.4161                           |
| 2     | 192.31                           | 0.82                              | 0.4662                           | 0.4451                            | 0.6904                           | 2.4223                           |
| 3     | 188.46                           | 0.8371                            | 0.4569                           | 0.4317                            | 0.6628                           | 2.3884                           |
| 4     | 184.69                           | 0.8203                            | 0.4614                           | 0.4101                            | 0.6760                           | 2.3679                           |
| 5     | 188.39                           | 0.8039                            | 0.4476                           | 0.4101                            | 0.6490                           | 2.3106                           |
| 6     | 190.27                           | 0.7959                            | 0.4252                           | 0.3896                            | 0.6425                           | 2.2532                           |
| 7     | 186.46                           | 0.8038                            | 0.4167                           | 0.3857                            | 0.6553                           | 2.2616                           |
| 8     | 188.33                           | 0.7878                            | 0.4375                           | 0.3703                            | 0.6553                           | 2.2509                           |
| 9     | 190.21                           | 0.7799                            | 0.4244                           | 0.3666                            | 0.6488                           | 2.2197                           |
| 10    | 192.11                           | 0.7721                            | 0.4372                           | 0.3849                            | 0.6358                           | 2.2300                           |
